# Supplementary material for: CuCl2-catalyzed highly stereoselective and chemoselective reduction of alkynyl amides into α,β-unsaturated amides using silanes as hydrogen donors
Source: Royal Society of Chemistry journal article supplement (doi:10.1039/d0ob02037k), 2020-12-10

# **CuCl<sub>2</sub>-catalyzed highly stereoselective and chemoselective reduction of alkynyl amides into $\alpha$ , $\beta$ - unsaturated amides using silanes as hydrogen donors**

**Lingfei Duan <sup>a</sup>, Kai Jiang <sup>a</sup>, Hua Zhu <sup>\*b</sup> and Biaolin Yin <sup>\*a</sup>**

<sup>a</sup> Key Laboratory of Functional Molecular Engineering of Guangdong Province, School of Chemistry and Chemical Engineering, South China University of Technology, Guangzhou, P. R. China, 510640

E-mail: [blyin@scut.edu.cn](mailto:blyin@scut.edu.cn)

<sup>b</sup> Guangxi Key Laboratory of Zhuang and Yao Ethnic Medicine, Guangxi University of Chinese Medicine, Nanning 530200, China.

| <b>Content</b>                                                     | <b>Page</b> |
|--------------------------------------------------------------------|-------------|
| General information                                                | 2           |
| General Procedure for the synthesis of 1 and characterization data | 2-3         |
| General procedure for the synthesis of 2 and characterization data | 3-9         |
| Reference                                                          | 10          |
| NMR spectra of substrates and products                             | 11-41       |

## General information

Unless otherwise noted, all experiments were performed under N<sub>2</sub> atmosphere. Solvents were treated with 4 Å molecular sieves or sodium and distilled prior to use. All reagents and starting materials were purchased from commercial suppliers and used as received. Infrared spectra (IR) were recorded on a Bruker TENSOR 27 FTIR spectrophotometer and were reported as wavelength numbers (cm<sup>-1</sup>). <sup>1</sup>H, <sup>13</sup>C, <sup>19</sup>F NMR spectra were recorded on a Bruker AVANCE 400 (400 MHz for <sup>1</sup>H; 100 MHz for <sup>13</sup>C; 376 MHz for <sup>19</sup>F) recording in CDCl<sub>3</sub> as a solvent. Chemical shifts (δ) were reported in ppm, and coupling constants (*J*) were in Hertz (Hz). The following abbreviations were used to explain the multiplicities: s = singlet, d = doublet, t = triplet, q = quartet, m = multiplet, br = broad. The HRMS measurements were recorded on a TOF analyzer using an ESI source in the positive mode. Column chromatography was performed on silica gel (100–200 mesh) with mixtures of petroleum ether and ethyl acetate as the eluent.

## General Procedure for the synthesis of 1 and characterization data

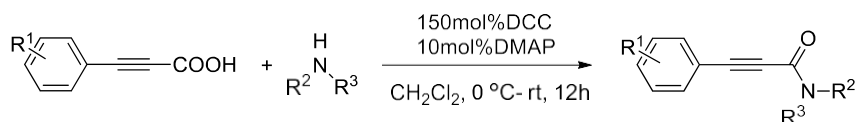

To a mixture of amine (5 mmol) and propiolic acid (5 mmol) in CH<sub>2</sub>Cl<sub>2</sub> (30 mL) was added a solution of DMAP (0.5 mmol, 10 mol%) and DCC (7.5 mmol, 1.5 equiv) in CH<sub>2</sub>Cl<sub>2</sub> (20 mL) at 0°C. The reaction mixture was stirred for 12 hours at room temperature and filtered through a short plug of silica gel, which was rinsed with EtOAc. The filtrate was concentrated in vacuo and the residue was purified by column chromatography on silica gel (petroleum ether /ethyl acetate = 4/1).

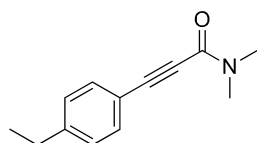

**2-Propynamide, N,N-dimethyl-3-(4-ethylphenyl)- (1c)**; White solid was obtained in 70% (0.70 g) isolated yield; IR (KBr)  $\nu$ : 2964, 2930, 2209, 1639, 1510, 1452, 1395, 1271, 1132, 1056, 835, 730, 667; <sup>1</sup>H NMR (400 MHz, CDCl<sub>3</sub>)  $\delta$  7.37 (d, *J* = 7.5 Hz, 2H), 7.09 (d, *J* = 7.6 Hz, 2H), 3.18 (s, 3H), 2.92 (s, 3H), 2.56 (q, *J* = 7.5 Hz, 2H), 1.13 (t, *J* = 7.5 Hz, 3H); <sup>13</sup>C NMR (100 MHz, CDCl<sub>3</sub>)  $\delta$  154.75, 146.68, 132.36, 128.08, 117.64, 90.58, 81.14, 38.35, 34.09, 28.87, 15.18; HRMS (ESI) *m/z* calcd for C<sub>13</sub>H<sub>15</sub>NO [M+H]<sup>+</sup> 202.1126, Found 202.1124.

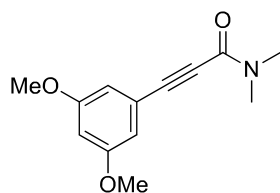

**2-Propynamide, N,N-dimethyl-3-(3,5-dimethoxyphenyl)- (1f)**; White solid was obtained in 71% (0.83 g) isolated yield; IR (KBr)  $\nu$ : 2934, 2220, 1632, 1592, 1457, 1396, 1351, 1264, 1203, 1157, 1061, 841, 732; <sup>1</sup>H NMR (400 MHz, CDCl<sub>3</sub>)  $\delta$  6.65 (s, 2H), 6.48 (s, 1H), 3.74 (s, 6H), 3.25 (s, 3H), 2.99 (s,

3H);  $^{13}\text{C}$  NMR (100 MHz,  $\text{CDCl}_3$ )  $\delta$  160.58, 154.47, 121.77, 110.02, 103.27, 90.07, 80.95, 55.46, 38.36, 34.11; HRMS (ESI)  $m/z$  calcd for  $\text{C}_{13}\text{H}_{15}\text{NO}_3$   $[\text{M}+\text{H}]^+$  234.1125, Found 234.1121.

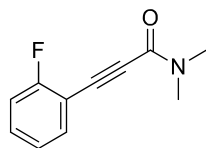

**2-Propynamide, N,N-dimethyl-3-(2-fluorophenyl)- (1j)**; White solid was obtained in 75% (0.72 g) isolated yield; IR (KBr)  $\nu$ : 2934, 2218, 1623, 1493, 1453, 1396, 1262, 1215, 1138, 770, 728, 685;  $^1\text{H}$  NMR (400 MHz,  $\text{CDCl}_3$ )  $\delta$  7.55 (t,  $J = 7.2$  Hz, 1H), 7.41 (dd,  $J = 14.2, 6.9$  Hz, 1H), 7.18-7.07 (m, 2H), 3.31 (s, 3H), 3.03 (s, 3H);  $^{13}\text{C}$  NMR (100 MHz,  $\text{CDCl}_3$ )  $\delta$  163.31 (d,  $J = 254.0$  Hz), 154.28, 134.19, 131.92 (d,  $J = 8.1$  Hz), 124.25 (d,  $J = 3.7$  Hz), 115.68 (d,  $J = 20.5$  Hz), 109.42 (d,  $J = 15.2$  Hz), 86.42 (d,  $J = 9.9$  Hz), 83.43, 38.33, 34.18;  $^{19}\text{F}$  NMR (376MHz,  $\text{CDCl}_3$ )  $\delta$  -108.42; HRMS (ESI)  $m/z$  calcd for  $\text{C}_{11}\text{H}_{10}\text{FNO}$   $[\text{M}+\text{H}]^+$  192.0819, Found 192.0817.

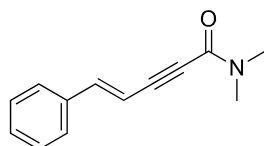

**4-Pentenamide, 2-alkynyl-N,N-dimethyl-5-phenyl-, (4E)- (1m)**; White solid was obtained in 53% (1.08 g) isolated yield; IR (KBr)  $\nu$ : 2926, 2192, 1624, 1488, 1441, 1391, 1268, 1184, 1069, 956, 730, 689;  $^1\text{H}$  NMR (400 MHz,  $\text{CDCl}_3$ )  $\delta$  7.47-7.31 (m, 5H), 7.17 (d,  $J = 16.3$  Hz, 1H), 6.26 (d,  $J = 16.3$  Hz, 1H), 3.26 (s, 3H), 3.02 (s, 3H);  $^{13}\text{C}$  NMR (100 MHz,  $\text{CDCl}_3$ )  $\delta$  154.70, 145.55, 135.37, 129.62, 128.87, 126.72, 105.62, 89.83, 83.41, 38.36, 34.15; HRMS (ESI)  $m/z$  calcd for  $\text{C}_{13}\text{H}_{13}\text{NO}$   $[\text{M}+\text{Na}]^+$  222.0889, Found 222.0892.

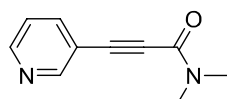

**N,N-dimethyl-3-(pyridin-3-yl)propiolamide (1o)**; White solid was obtained in 62% (0.58 g) isolated yield; IR (KBr)  $\nu$ : 3039, 2919, 2850, 2215, 1620, 1558, 1495, 1403, 1270, 1189, 1133, 1019, 704;  $^1\text{H}$  NMR (400 MHz,  $\text{CDCl}_3$ )  $\delta$  8.77 (s, 1H), 8.63 (d,  $J = 3.8$  Hz, 1H), 7.85 (d,  $J = 7.9$  Hz, 1H), 7.33 (dd,  $J = 7.8, 5.0$  Hz, 1H), 3.30 (s, 1H), 3.05 (s, 1H);  $^{13}\text{C}$  NMR (100 MHz,  $\text{CDCl}_3$ )  $\delta$  154.03, 152.67, 150.14, 139.31, 123.19, 117.97, 86.61, 84.51, 38.40, 34.24; HRMS (ESI)  $m/z$  calcd for  $\text{C}_{10}\text{H}_{10}\text{N}_2\text{O}$   $[\text{M}+\text{H}]^+$  175.0866, Found 175.0863.

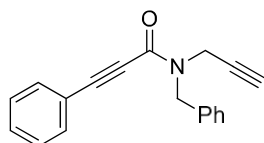

**2-Propynamide, 3-phenyl-N-(phenylmethyl)-N-2-propyn-1-yl- (1v)**; Yellow oil was obtained in 79% (1.08 g) isolated yield; IR (KBr)  $\nu$ : 3294, 3032, 2925, 2214, 1629, 1492, 1411, 1359, 1268, 1196, 1044, 920, 756, 688;  $^1\text{H}$  NMR (400 MHz,  $\text{CDCl}_3$ )  $\delta$  7.61-7.24 (m, 10H), 5.00 (s, 1H), 4.80 (s, 1H), 4.33 (s, 1H), 4.19 (s, 1H), 2.31 (d,  $J = 37.5$  Hz, 1H);  $^{13}\text{C}$  NMR (100 MHz,  $\text{CDCl}_3$ )  $\delta$  154.27, 135.58, 132.54,

130.32, 128.94, 128.79, 128.60, 128.19, 127.90, 120.20, 91.11, 81.28, 80.94, 73.24, 72.60, 51.59, 46.78, 37.65, 32.54; HRMS (ESI)  $m/z$  calcd for  $C_{19}H_{15}NO$   $[M+Na]^+$  296.1046, Found 296.1045.

### General procedure for the synthesis of **2** and characterization data

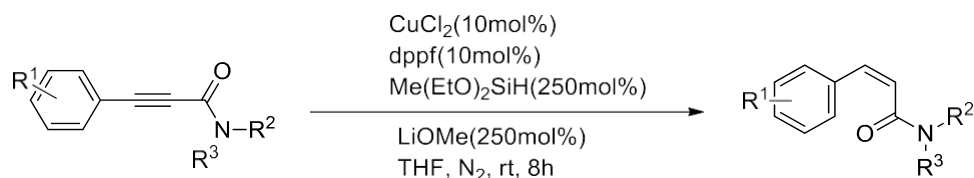

$CuCl_2$  (6.7 mg, 0.05 mmol, 10 mol%) and  $dppf$  (27.8 mg, 0.05 mmol, 10 mol%) were dissolved in THF (2mL). Subsequently, **1** (0.5 mmol),  $Me(EtO)_2SiH$  (167.8 mg, 1.25 mmol, 2.5 equiv.) and  $LiOMe$  (47.5 mg, 1.25 mmol, 2.5 equiv.) were added in a Schlenk flask under nitrogen atmosphere. After being stirred at room temperature for 8 h, the resulting mixture was extracted with  $AcOEt$  (3×5 mL). The combined organic layers were washed with brine, dried over  $Na_2SO_4$ , filtered and concentrated. The crude product was purified by flash column chromatography on a silica gel (petroleum ether/ethyl acetate = 4/1) to give product **2**.

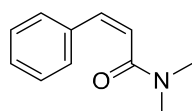

**2-Propenamide, N,N-dimethyl-3-phenyl-, (Z)- (2a)**<sup>1</sup>; Colorless oil was obtained in 92% (81 mg) isolated yield; IR (KBr)  $\nu$ : 3025, 2928, 1634, 1496, 1445, 1401, 1376, 1265, 1143, 782, 701;  $^1H$  NMR (400 MHz,  $CDCl_3$ )  $\delta$  7.35-7.27 (m, 5H), 6.64 (d,  $J = 12.6$  Hz, 1H), 6.03 (d,  $J = 12.6$  Hz, 1H), 2.97 (s, 3H), 2.82 (s, 3H);  $^{13}C$  NMR (100 MHz,  $CDCl_3$ )  $\delta$  168.97, 135.64, 133.27, 128.56, 128.39, 128.15, 123.43, 37.46, 34.36.

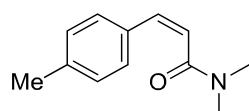

**2-Propenamide, N,N-dimethyl-3-(4-methylphenyl)-, (Z)- (2b)**; Colorless oil was obtained in 96% (91 mg) isolated yield; IR (KBr)  $\nu$ : 3019, 2964, 2930, 1642, 1512, 1454, 1402, 1374, 1266, 1141, 872, 837;  $^1H$  NMR (400 MHz,  $CDCl_3$ )  $\delta$  7.23 (d,  $J = 7.8$  Hz, 2H), 7.11 (d,  $J = 7.9$  Hz, 2H), 6.60 (d,  $J = 12.6$  Hz, 1H), 5.97 (d,  $J = 12.6$  Hz, 1H), 2.98 (s, 3H), 2.83 (s, 3H), 2.33 (s, 3H);  $^{13}C$  NMR (100 MHz,  $CDCl_3$ )  $\delta$  169.21, 138.36, 133.25, 132.82, 129.26, 128.10, 122.40, 37.50, 34.37, 21.27; HRMS (ESI)  $m/z$  calcd for  $C_{12}H_{15}NO$   $[M+H]^+$  190.1226, Found 190.1225.

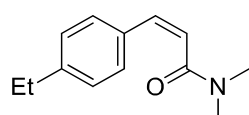

**2-Propenamide, N,N-dimethyl-3-(4-ethylphenyl)-, (Z)- (2c)**; Colorless oil was obtained in 91% (92 mg) isolated yield; IR (KBr)  $\nu$ : 3022, 2921, 1636, 1510, 1454, 1398, 1373, 1263, 1139, 869, 821;  $^1H$  NMR (400 MHz,  $CDCl_3$ )  $\delta$  7.26 (d,  $J = 7.8$  Hz, 2H), 7.13 (d,  $J = 7.8$  Hz, 2H), 6.59 (d,  $J = 12.6$  Hz, 1H),

5.97 (d,  $J = 12.6$  Hz, 1H), 2.98 (s, 3H), 2.83 (s, 3H), 2.62 (q,  $J = 7.5$  Hz, 2H), 1.21 (t,  $J = 7.6$  Hz, 3H);  $^{13}\text{C}$  NMR (100 MHz,  $\text{CDCl}_3$ )  $\delta$  169.15, 144.65, 133.24, 133.01, 128.20, 128.03, 122.41, 37.47, 34.33, 28.95, 15.34; HRMS (ESI)  $m/z$  calcd for  $\text{C}_{13}\text{H}_{17}\text{NO}$   $[\text{M}+\text{H}]^+$  204.1383, Found 204.1384.

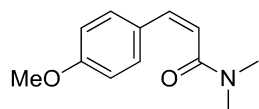

**2-Propenamide, N,N-dimethyl-3-(4-methoxyphenyl)-, (2Z)-(2d)<sup>1</sup>**; Colorless oil was obtained in 93% (95 mg) isolated yield; IR (KBr)  $\nu$ : 3012, 2923, 1630, 1510, 1456, 1399, 1255, 1178, 1141, 1031, 836;  $^1\text{H}$  NMR (400 MHz,  $\text{CDCl}_3$ )  $\delta$  7.33-7.24 (m, 2H), 6.86-6.77 (m, 2H), 6.56 (d,  $J = 12.5$  Hz, 1H), 5.91 (d,  $J = 12.5$  Hz, 1H), 3.78 (s, 3H), 2.98 (s, 3H), 2.85 (s, 3H);  $^{13}\text{C}$  NMR (100 MHz,  $\text{CDCl}_3$ )  $\delta$  169.23, 159.66, 132.93, 129.69, 128.29, 121.21, 113.91, 55.22, 55.19, 37.50, 34.35.

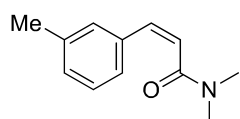

**2-Propenamide, N,N-dimethyl-3-(3-methylphenyl)-, (2Z)-(2e)**; Colorless oil was obtained in 92% (81 mg) isolated yield; IR (KBr)  $\nu$ : 3018, 2923, 1636, 1509, 1450, 1401, 1372, 1264, 1140, 972, 869, 822;  $^1\text{H}$  NMR (400 MHz,  $\text{CDCl}_3$ )  $\delta$  7.24 (d,  $J = 7.8$  Hz, 2H), 7.11 (d,  $J = 7.8$  Hz, 2H), 6.60 (d,  $J = 12.6$  Hz, 1H), 5.97 (d,  $J = 12.6$  Hz, 1H), 2.98 (s, 3H), 2.83 (s, 3H), 2.33 (s, 3H);  $^{13}\text{C}$  NMR (100 MHz,  $\text{CDCl}_3$ )  $\delta$  169.20, 138.37, 133.24, 132.83, 129.27, 128.11, 122.43, 37.50, 34.38, 21.29; HRMS (ESI)  $m/z$  calcd for  $\text{C}_{12}\text{H}_{15}\text{NO}$   $[\text{M}+\text{H}]^+$  190.1126, Found 190.1124.

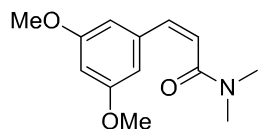

**2-Propenamide, N,N-dimethyl-3-(3,5-dimethoxyphenyl)-, (2Z)-(2f)<sup>1</sup>**; Colorless oil was obtained in 95% (112 mg) isolated yield; IR (KBr)  $\nu$ : 3001, 2935, 2838, 1621, 1594, 1457, 1406, 1373, 1307, 1264, 1201, 1156, 1062, 853, 684;  $^1\text{H}$  NMR (400 MHz,  $\text{CDCl}_3$ )  $\delta$  6.56 (d,  $J = 12.6$  Hz, 1H), 6.52 (s, 2H), 6.40 (s, 1H), 6.03 (d,  $J = 12.5$  Hz, 1H), 3.76 (s, 6H), 2.98 (s, 3H), 2.85 (s, 3H);  $^{13}\text{C}$  NMR (100 MHz,  $\text{CDCl}_3$ )  $\delta$  168.96, 160.78, 137.53, 132.97, 123.89, 105.87, 100.96, 55.34, 37.54, 34.37; HRMS (ESI)  $m/z$  calcd for  $\text{C}_{13}\text{H}_{17}\text{NO}_3$   $[\text{M}+\text{H}]^+$  236.1281, Found 236.1277.

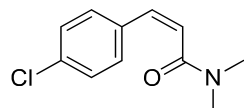

**2-Propenamide, N,N-dimethyl-3-(4-chlorophenyl)-, (2Z)-(2g)<sup>1</sup>**; Colorless oil was obtained in 96% (100 mg) isolated yield; IR (KBr)  $\nu$ : 3017, 928, 1637, 1492, 1453, 1399, 1373, 1263, 1142, 1091, 1013, 833, 780, 691;  $^1\text{H}$  NMR (400 MHz,  $\text{CDCl}_3$ )  $\delta$  7.43-7.21 (m, 4H), 6.60 (d,  $J = 12.6$  Hz, 1H), 6.08 (d,  $J = 12.6$  Hz, 1H), 2.99 (s, 3H), 2.86 (s, 3H);  $^{13}\text{C}$  NMR (100 MHz,  $\text{CDCl}_3$ )  $\delta$  168.57, 134.24, 134.04, 132.16, 129.53, 128.77, 124.03, 37.52, 34.44.

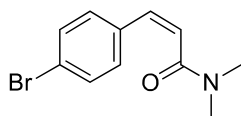

**2-Propenamide, N,N-dimethyl-3-(4-bromophenyl)-, (2Z)-(2h);** Colorless oil was obtained in 90% (113 mg) isolated yield; IR (KBr)  $\nu$ : 3021, 2926, 1635, 1497, 1449, 1402, 1373, 1263, 1141, 1053, 779, 694;  $^1\text{H}$  NMR (400 MHz,  $\text{CDCl}_3$ )  $\delta$  7.39-7.23 (m, 5H), 6.63 (d,  $J = 12.6$  Hz, 1H), 6.03 (d,  $J = 12.6$  Hz, 1H), 2.97 (s, 3H), 2.82 (s, 3H);  $^{13}\text{C}$  NMR (100 MHz,  $\text{CDCl}_3$ )  $\delta$  168.97, 135.62, 133.27, 128.56, 128.39, 128.14, 123.41, 37.48, 34.36; HRMS (ESI)  $m/z$  calcd for  $\text{C}_{11}\text{H}_{12}\text{BrNO}$   $[\text{M}+\text{H}]^+$  256.0155, Found 256.0151.

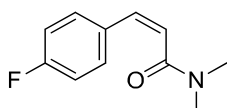

**2-Propenamide, N,N-dimethyl-3-(4-fluorophenyl)-, (2Z)-(2i)<sup>1</sup>;** Colorless oil was obtained in 98% (95 mg) isolated yield; IR (KBr)  $\nu$ : 3008, 2930, 1625, 1508, 1402, 1373, 1229, 1141, 840, 721;  $^1\text{H}$  NMR (400 MHz,  $\text{CDCl}_3$ )  $\delta$  7.35 (dd,  $J = 8.3, 5.6$  Hz, 2H), 6.99 (t,  $J = 8.6$  Hz, 2H), 6.60 (d,  $J = 12.6$  Hz, 1H), 6.03 (d,  $J = 12.6$  Hz, 1H), 2.98 (s, 3H), 2.86 (s, 3H);  $^{13}\text{C}$  NMR (100 MHz,  $\text{CDCl}_3$ )  $\delta$  168.69, 162.59 (d,  $J = 248.7$  Hz), 132.26, 131.75 (d,  $J = 3.4$  Hz), 130.08 (d,  $J = 8.2$  Hz), 123.20, 115.53 (d,  $J = 21.6$  Hz), 37.48, 34.39;  $^{19}\text{F}$  NMR (376MHz,  $\text{CDCl}_3$ )  $\delta$  -112.66.

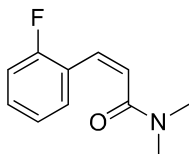

**2-Propenamide, N,N-dimethyl-3-(2-fluorophenyl)-, (2Z)-(2j);** Colorless oil was obtained in 99% (96 mg) isolated yield; IR (KBr)  $\nu$ : 3029, 2929, 1635, 1488, 1454, 1408, 1374, 1238, 1142, 1097, 831, 761;  $^1\text{H}$  NMR (400 MHz,  $\text{CDCl}_3$ )  $\delta$  7.43 (t,  $J = 7.7$  Hz, 1H), 7.32-7.20 (m, 1H), 7.10-6.98 (m, 2H), 6.82 (d,  $J = 12.6$  Hz, 1H), 6.16 (d,  $J = 12.6$  Hz, 1H), 2.95 (s, 3H), 2.85 (s, 3H);  $^{13}\text{C}$  NMR (100 MHz,  $\text{CDCl}_3$ )  $\delta$  168.44, 160.05 (d,  $J = 249.5$  Hz), 130.15 (d,  $J = 8.5$  Hz), 129.14 (d,  $J = 2.8$  Hz), 126.02, 125.99 (d,  $J = 5.3$  Hz), 124.15 (d,  $J = 3.6$  Hz), 123.47 (d,  $J = 12.7$  Hz), 115.42 (d,  $J = 21.8$  Hz), 37.49, 34.39;  $^{19}\text{F}$  NMR (376MHz,  $\text{CDCl}_3$ )  $\delta$  -116.41; HRMS (ESI)  $m/z$  calcd for  $\text{C}_{11}\text{H}_{12}\text{FNO}$   $[\text{M}+\text{H}]^+$  194.0976, Found 194.0973.

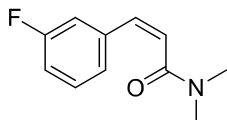

**2-Propenamide, N,N-dimethyl-3-(3-fluorophenyl)-, (2Z)-(2k);** Colorless oil was obtained in 93% (90 mg) isolated yield; IR (KBr)  $\nu$ : 3011, 2929, 1629, 1580, 1490, 1445, 1405, 1373, 1253, 1151, 878, 792, 681;  $^1\text{H}$  NMR (400 MHz,  $\text{CDCl}_3$ )  $\delta$  7.27 (dd,  $J = 14.8, 7.0$  Hz, 1H), 7.13 (d,  $J = 7.7$  Hz, 1H), 7.07 (d,  $J = 10.1$  Hz, 1H), 6.97 (t,  $J = 8.3$  Hz, 1H), 6.59 (d,  $J = 12.6$  Hz, 1H), 6.10 (d,  $J = 12.6$  Hz, 1H), 2.99 (s, 3H), 2.86 (s, 3H);  $^{13}\text{C}$  NMR (100 MHz,  $\text{CDCl}_3$ )  $\delta$  168.40, 162.79 (d,  $J = 245.9$  Hz), 137.69 (d,  $J = 7.8$  Hz), 131.99 (d,  $J = 2.4$  Hz), 130.06 (d,  $J = 8.3$  Hz), 124.73, 124.05 (d,  $J = 2.8$  Hz), 115.29 (d,  $J =$

21.3 Hz), 114.79 (d,  $J = 22.2$  Hz), 37.46, 34.39;  $^{19}\text{F}$  NMR (376 MHz,  $\text{CDCl}_3$ )  $\delta -112.91$ ; HRMS (ESI)  $m/z$  calcd for  $\text{C}_{11}\text{H}_{12}\text{FNO}$   $[\text{M}+\text{H}]^+$  194.0976, Found 194.0972.

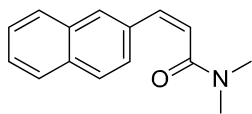

**2-Propenamide, N,N-dimethyl-3-(2-naphthalenyl)-, (2Z)-(2l)<sup>4</sup>**; Colorless oil was obtained in 99% (111 mg) isolated yield; IR (KBr)  $\nu$ : 3052, 2928, 1634, 1500, 1451, 1406, 1377, 1264, 1142, 863, 821, 749;  $^1\text{H}$  NMR (400 MHz,  $\text{CDCl}_3$ )  $\delta$  7.89-7.72 (m, 4H), 7.55-7.42 (m, 3H), 6.81 (d,  $J = 12.6$  Hz, 1H), 6.13 (d,  $J = 12.6$  Hz, 1H), 3.02 (s, 3H), 2.83 (s, 3H);  $^{13}\text{C}$  NMR (100 MHz,  $\text{CDCl}_3$ )  $\delta$  169.10, 133.31, 133.23, 133.12, 128.31, 128.24, 128.13, 127.63, 126.38, 125.33, 123.68, 37.57, 34.43.

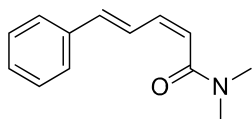

**2,4-Pentadienamide, N,N-dimethyl-5-phenyl-, (2Z,4E)-(2m)<sup>1</sup>**; Colorless oil was obtained in 87% (87 mg) isolated yield; IR (KBr)  $\nu$ : 3056, 2922, 1631, 1512, 1489, 454, 1397, 1365, 1259, 1138, 1051, 997, 958, 801, 753, 695;  $^1\text{H}$  NMR (400 MHz,  $\text{CDCl}_3$ )  $\delta$  7.78 (dd,  $J = 15.7, 11.2$  Hz, 1H), 7.50 (d,  $J = 7.6$  Hz, 2H), 7.36-7.23 (m, 3H), 6.74 (d,  $J = 15.7$  Hz, 1H), 6.58 (t,  $J = 11.3$  Hz, 1H), 6.05 (d,  $J = 11.3$  Hz, 1H), 3.07 (s, 3H), 3.05 (s, 3H);  $^{13}\text{C}$  NMR (100 MHz,  $\text{CDCl}_3$ )  $\delta$  167.44, 139.32, 138.60, 136.65, 128.61, 128.44, 127.24, 125.37, 119.77, 37.87, 35.14.

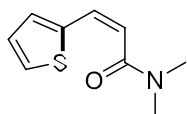

**(Z)-N,N-dimethyl-3-(thiophen-2-yl)acrylamide (2n)**; Colorless oil was obtained in 92% (83 mg) isolated yield; IR (KBr)  $\nu$ : 3058, 2929, 1635, 1496, 1455, 1373, 1266, 1214, 1135, 737, 699;  $^1\text{H}$  NMR (400 MHz,  $\text{CDCl}_3$ )  $\delta$  7.32 (d,  $J = 4.8$  Hz, 1H), 7.14 (d,  $J = 2.8$  Hz, 1H), 6.99 – 6.97 (m, 1H), 6.79 (d,  $J = 12.4$  Hz, 1H), 5.95 (d,  $J = 12.4$  Hz, 1H), 3.04 (s, 1H), 3.02 (s, 1H);  $^{13}\text{C}$  NMR (100 MHz,  $\text{CDCl}_3$ )  $\delta$  168.02, 138.24, 130.46, 128.36, 127.53, 126.89, 119.27, 37.59, 34.73; HRMS (ESI)  $m/z$  calcd for  $\text{C}_9\text{H}_{11}\text{NOS}$   $[\text{M}+\text{H}]^+$  182.0634, Found 182.0631.

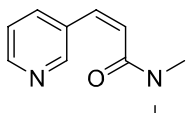

**(Z)-N,N-dimethyl-3-(thiophen-2-yl)acrylamide (2o)**; Colorless oil was obtained in 42% (37 mg) isolated yield; IR (KBr)  $\nu$ : 2925, 1635, 1540, 1496, 1456, 1143, 817, 737, 700;  $^1\text{H}$  NMR (400 MHz,  $\text{CDCl}_3$ )  $\delta$  8.56 (s, 1H), 8.51 (d,  $J = 4.2$  Hz, 1H), 7.78 (d,  $J = 7.9$  Hz, 1H), 7.27 – 7.23 (m, 1H), 6.64 (d,  $J = 12.6$  Hz, 1H), 6.22 (d,  $J = 12.6$  Hz, 1H), 3.01 (s, 1H), 2.92 (s, 1H);  $^{13}\text{C}$  NMR (100 MHz,  $\text{CDCl}_3$ )  $\delta$  168.04, 149.76, 149.31, 135.05, 131.30, 130.13, 125.81, 123.45, 37.53, 34.48; HRMS (ESI)  $m/z$  calcd for  $\text{C}_{10}\text{H}_{12}\text{N}_2\text{O}$   $[\text{M}+\text{H}]^+$  177.1022, Found 177.1020.

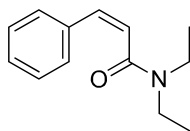

**2-Propenamide, N,N-diethyl-3-phenyl-, (2Z)-(2p)**; Colorless oil was obtained in 91% (92 mg) isolated yield; IR (KBr)  $\nu$ : 2972, 2931, 1615, 1431, 1380, 1269, 1140, 1072, 858, 778, 740, 697;  $^1\text{H}$  NMR (400 MHz,  $\text{CDCl}_3$ )  $\delta$  7.44-7.39 (m, 2H), 7.34-7.24 (m, 3H), 6.61 (d,  $J = 12.7$  Hz, 1H), 6.07 (d,  $J = 12.6$  Hz, 1H), 3.48 (q,  $J = 7.1$  Hz, 2H), 3.27 (q,  $J = 7.2$  Hz, 2H), 1.18 (t,  $J = 7.1$  Hz, 3H), 0.97 (t,  $J = 7.2$  Hz, 3H);  $^{13}\text{C}$  NMR (100 MHz,  $\text{CDCl}_3$ )  $\delta$  168.28, 135.53, 132.70, 128.45, 128.40, 128.33, 123.78, 42.58, 38.93, 13.98, 12.44; HRMS (ESI)  $m/z$  calcd for  $\text{C}_{13}\text{H}_{17}\text{NO}$   $[\text{M}+\text{H}]^+$  204.1383, Found 204.1380.

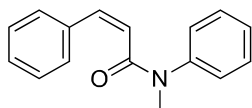

**2-Propenamide, N-methyl-N,3-diphenyl-, (2Z)-(2q)<sup>2</sup>**; Colorless oil was obtained in 94% (111 mg) isolated yield; IR (KBr)  $\nu$ : 3035, 2917, 1634, 1493, 1452, 1424, 1374, 1240, 1079, 1047, 916, 735, 696;  $^1\text{H}$  NMR (400 MHz,  $\text{CDCl}_3$ )  $\delta$  7.41 (d,  $J = 7.1$  Hz, 1.5H), 7.37-7.28 (m, 7H), 7.09 (d,  $J = 6.7$  Hz, 1.5H), 6.70 (d,  $J = 12.7$  Hz, 1H), 6.21 (d,  $J = 12.7$  Hz, 1H), 4.62 (s, 1.5H), 4.42 (s, 1.5H);  $^{13}\text{C}$  NMR (100 MHz,  $\text{CDCl}_3$ )  $\delta$  169.22, 136.49, 136.26, 135.36, 133.98, 129.08, 128.87, 128.60, 128.58, 128.53, 127.70, 127.60, 127.19, 123.17, 50.50, 46.70.

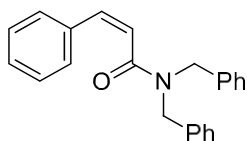

**2-Propenamide, 3-phenyl-N,N-bis(phenylmethyl)-, (2Z)-(2r)<sup>3</sup>**; Colorless oil was obtained in 99% (162 mg) isolated yield; IR (KBr)  $\nu$ : 3028, 2926, 1638, 1493, 1450, 1426, 1215, 1077, 948, 737, 697;  $^1\text{H}$  NMR (400 MHz,  $\text{CDCl}_3$ )  $\delta$  7.22 (d,  $J = 7.6$  Hz, 2H), 7.18-7.05 (m, 11H), 6.89 (d,  $J = 7.1$  Hz, 2H), 6.49 (d,  $J = 12.7$  Hz, 1H), 6.01 (d,  $J = 12.7$  Hz, 1H), 4.44 (s, 2H), 4.22 (s, 2H);  $^{13}\text{C}$  NMR (100 MHz,  $\text{CDCl}_3$ )  $\delta$  169.24, 136.52, 136.27, 135.39, 134.02, 129.10, 128.90, 128.64, 128.61, 128.56, 127.73, 127.64, 127.23, 123.20, 50.54, 46.47.

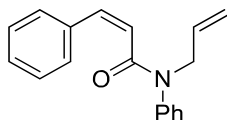

**2-Propenamide, N,3-diphenyl-N-2-propenyl-, (2Z)- (2s)**; Colorless oil was obtained in 98% (129 mg) isolated yield; IR (KBr)  $\nu$ : 3061, 3028, 2923, 1649, 1593, 1494, 1451, 1407, 1366, 1268, 1223, 1136, 991, 924, 771, 697;  $^1\text{H}$  NMR (400 MHz,  $\text{CDCl}_3$ )  $\delta$  7.44 (d,  $J = 6.7$  Hz, 2H), 7.34 (d,  $J = 7.0$  Hz, 3H), 7.29-7.22 (m, 3H), 6.95 (s, 2H), 6.41 (d,  $J = 12.6$  Hz, 1H), 5.99-5.80 (m, 2H), 5.18-5.09 (m, 2H), 4.40 (d,  $J = 6.0$  Hz, 2H);  $^{13}\text{C}$  NMR (100 MHz,  $\text{CDCl}_3$ )  $\delta$  167.46, 142.02, 135.59, 135.28, 132.85, 129.04, 128.98, 128.43, 128.22, 127.64, 127.52, 123.90, 118.10, 51.74; HRMS (ESI)  $m/z$  calcd for  $\text{C}_{18}\text{H}_{17}\text{NO}$   $[\text{M}+\text{H}]^+$  264.1383, Found 264.1380.



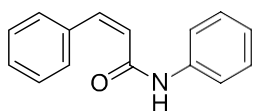

**2-Propenamide, N,3-diphenyl-, (2Z)-(2t)<sup>5</sup>**; Colorless oil was obtained in 99% (110 mg) isolated yield; IR (KBr)  $\nu$ : 3266, 3129, 3057, 1654, 1597, 1538, 1495, 1440, 1312, 1257, 1183, 752, 691; <sup>1</sup>H NMR (400 MHz, CDCl<sub>3</sub>)  $\delta$  7.69 (br, 1H), 7.53 (d,  $J$  = 7.0 Hz, 2H), 7.44-7.33 (m, 5H), 7.30 (t,  $J$  = 7.8 Hz, 2H), 7.12 (t,  $J$  = 7.3 Hz, 1H), 6.88 (d,  $J$  = 12.5 Hz, 1H), 6.11 (d,  $J$  = 12.5 Hz, 1H); <sup>13</sup>C NMR (100 MHz, CDCl<sub>3</sub>)  $\delta$  165.13, 137.83, 137.71, 134.77, 129.19, 128.98, 128.62, 124.80, 124.47, 120.07.

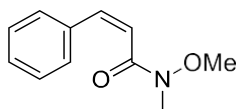

**2-Propenamide, N-methoxy-N-methyl-3-phenyl-, (2Z)-(2u)<sup>6</sup>**; Colorless oil was obtained in 99% (95 mg) isolated yield; IR (KBr)  $\nu$ : 3024, 2921, 1650, 1514, 1453, 1369, 1176, 992, 758, 695; <sup>1</sup>H NMR (400 MHz, CDCl<sub>3</sub>)  $\delta$  7.62-7.47 (m, 2H), 7.40-7.27 (m, 3H), 6.78 (d,  $J$  = 12.7 Hz, 1H), 6.28 (br, 1H), 3.82-3.18 (m, 6H); <sup>13</sup>C NMR (100 MHz, CDCl<sub>3</sub>)  $\delta$  173.66, 171.62, 143.44, 137.74, 135.22, 129.15, 128.63, 128.48, 128.46, 128.30, 126.12, 120.66, 61.21, 33.80, 32.20, 30.71.

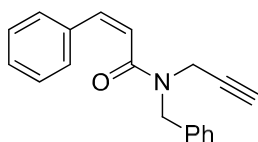

**2-Propenamide, 3-phenyl-N-(phenylmethyl)-N-2-propyn-1-yl-, (2Z)-(2v)**; Colorless oil was obtained in 83% (114 mg) isolated yield; IR (KBr)  $\nu$ : 3289, 3026, 1637, 1492, 1425, 1383, 1215, 1046, 918, 772, 734, 693; <sup>1</sup>H NMR (400 MHz, CDCl<sub>3</sub>)  $\delta$  7.47 (d,  $J$  = 7.3 Hz, 1H), 7.39-7.22 (m, 8H), 7.10 (d,  $J$  = 7.1 Hz, 1H), 6.73 (d,  $J$  = 12.6 Hz, 1H), 6.16 (d,  $J$  = 12.6 Hz, 1H), 4.81 (s, 1H), 4.58 (s, 1H), 4.22 (s, 1H), 3.92 (s, 1H), 2.26 (d,  $J$  = 12.3 Hz, 1H); <sup>13</sup>C NMR (100 MHz, CDCl<sub>3</sub>)  $\delta$  168.83, 168.61, 135.68, 135.08, 134.64, 129.00, 128.84, 128.73, 128.71, 128.68, 128.64, 128.52, 128.49, 127.90, 127.78, 127.48, 122.59, 122.18, 77.94, 77.84, 73.09, 72.08, 50.68, 46.76, 36.71, 32.64; HRMS (ESI)  $m/z$  calcd for C<sub>19</sub>H<sub>17</sub>NO [M+H]<sup>+</sup> 276.1383, Found 276.1381.

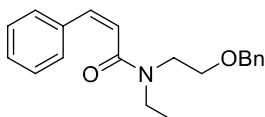

**(Z)-N-(2-(benzyloxy)ethyl)-N-ethyl-3-phenylacrylamide (2w)**; Colorless oil was obtained in 98% (151 mg) isolated yield; IR (KBr)  $\nu$ : 3059, 3028, 2974, 2932, 2864, 1626, 1494, 1432, 1362, 1269, 1107, 724, 699; <sup>1</sup>H NMR (400 MHz, CDCl<sub>3</sub>)  $\delta$  7.43 – 7.36 (m, 1H), 7.34 – 7.20 (m, 5H), 6.58 (dd,  $J$  = 16.6, 12.7 Hz, 1H), 6.07 (dd,  $J$  = 16.9, 9.2 Hz, 1H), 4.51 (s, 1H), 4.37 (s, 1H), 3.70 (t,  $J$  = 5.4 Hz, 1H), 3.64 (t,  $J$  = 5.3 Hz, 1H), 3.50 (q,  $J$  = 7.1 Hz, 1H), 3.43 – 3.33 (m, 2H), 1.14 (t,  $J$  = 7.1 Hz, 1H), 0.97 (t,  $J$  = 7.2 Hz, 2H); <sup>13</sup>C NMR (100 MHz, CDCl<sub>3</sub>)  $\delta$  168.93, 168.87, 138.18, 137.84, 135.54, 135.48, 133.17, 132.67, 128.50, 128.49, 128.46, 128.41, 127.77, 127.64, 127.56, 124.22, 123.48, 73.25, 73.23, 68.44, 68.22, 47.72, 44.37, 44.32, 40.20, 13.91, 12.25; HRMS (ESI)  $m/z$  calcd for C<sub>20</sub>H<sub>23</sub>NO<sub>2</sub> [M+H]<sup>+</sup> 310.1802, Found 310.1796.

## Reference

- [1] Satoshi, K.; Hiroki, I.; Tsugihiko, H.; Tomohide, F.; Katsuo, O. *J. Org. Chem.* **2002**, *67*, 4093–4099.
- [2] Wen-Peng, M.; Ji-Tao, W.; Yong-Mei, X.; Pu, M.; Kui, L. *Tetrahedron* **2015**, *71*, 8041–8051.
- [3] Satoshi, K.; Tsugihiko, H.; Yuko, O.; Katsuo, O. *Phosphorus, Sulfur and Silicon*, **2002**, *177*, 729–732.
- [4] Tianlong, Y.; Maojian, L.; Zhaowei, L.; Mingqiang, H.; Shunyou, C. *Org. Biomol. Chem.* **2019**, *17*, 449–453.
- [5] Kaori, A. *Synlett*, **2001**, *8*, 1272–1274.
- [6] Kaori, A.; Shigeo, N.; Yuko, T. *Tetrahedron Letters* **2009**, *50*, 5689–5691.

## NMR spectra of substrates and products

$^1\text{H}$  NMR spectrum (400 MHz,  $\text{CDCl}_3$ ) of **1c**

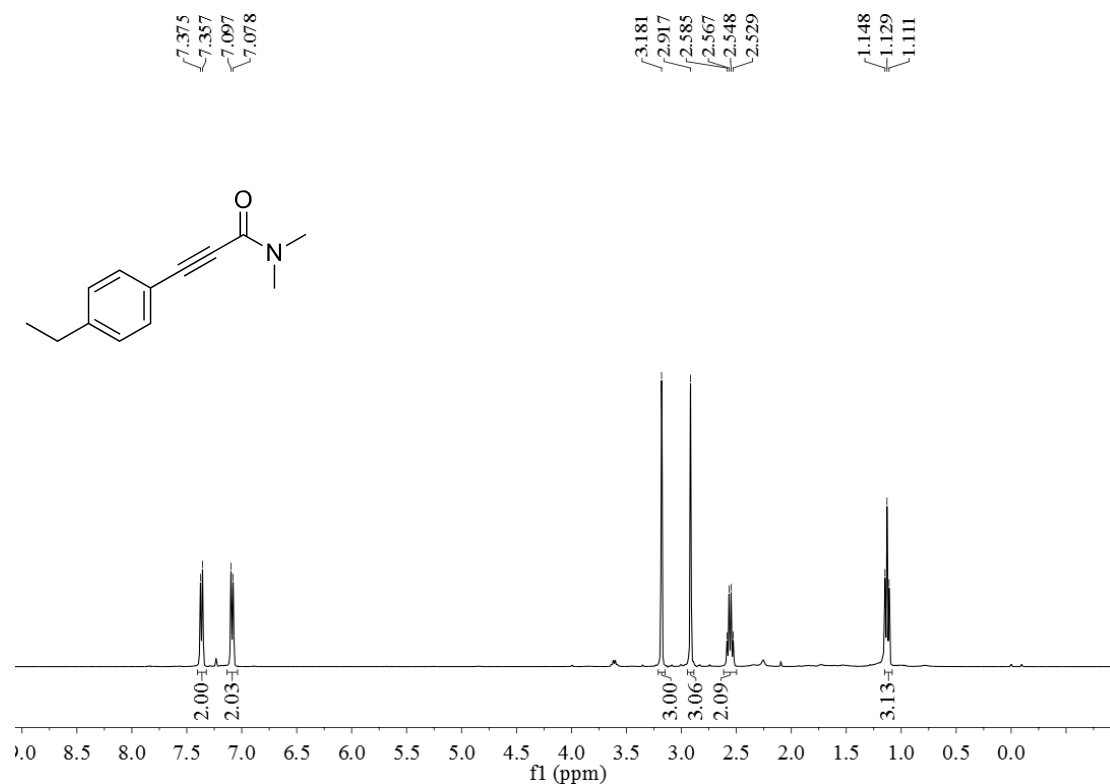

$^{13}\text{C}$  NMR spectrum (100 MHz,  $\text{CDCl}_3$ ) of **1c**

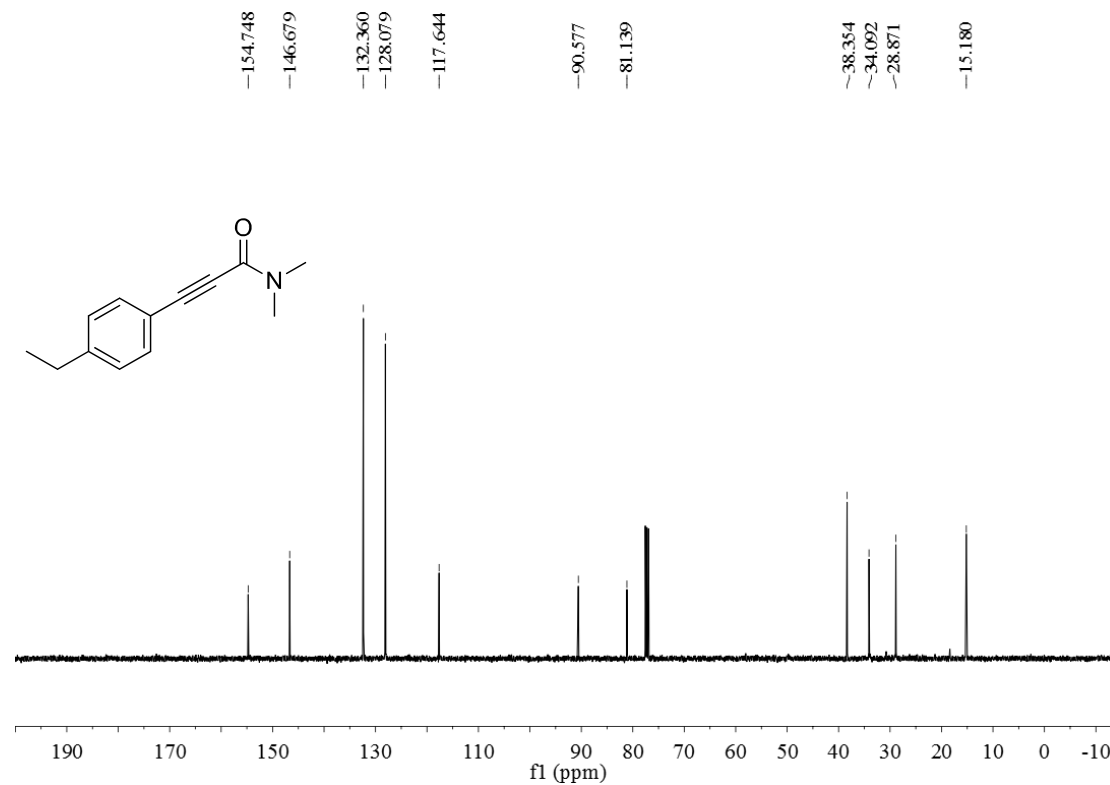

$^1\text{H}$  NMR spectrum (400 MHz,  $\text{CDCl}_3$ ) of **1f**

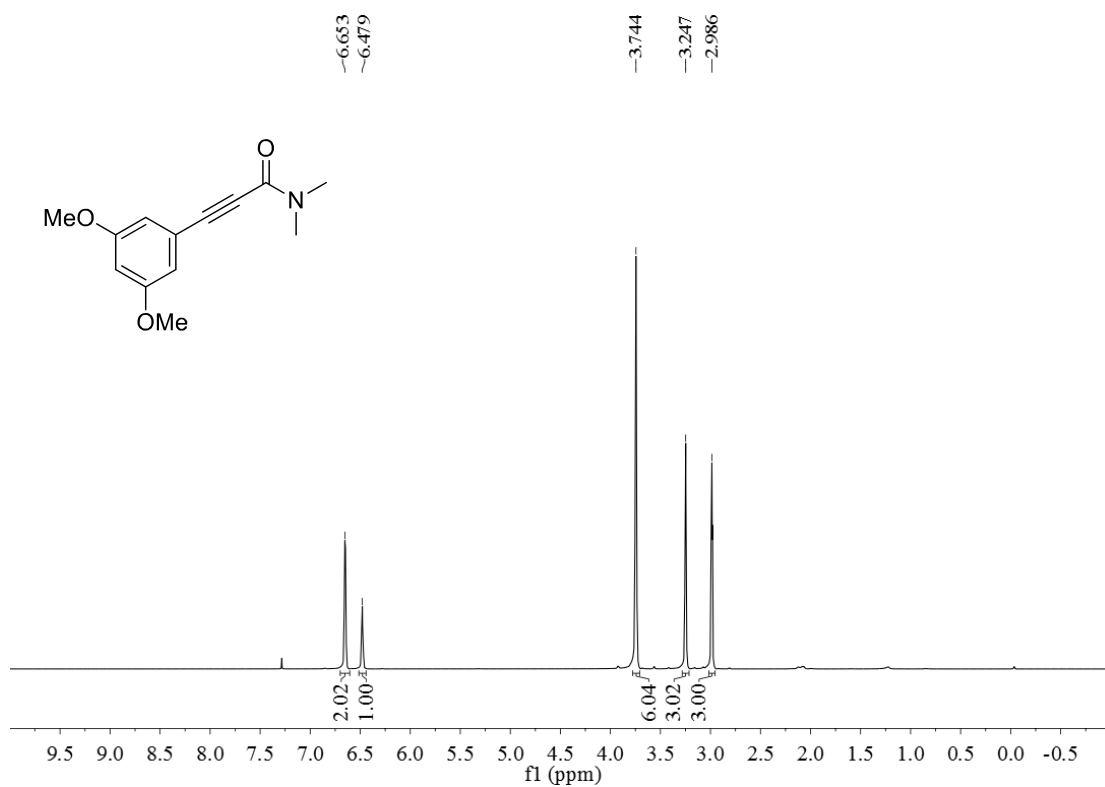

$^{13}\text{C}$  NMR spectrum (100 MHz,  $\text{CDCl}_3$ ) of **1f**

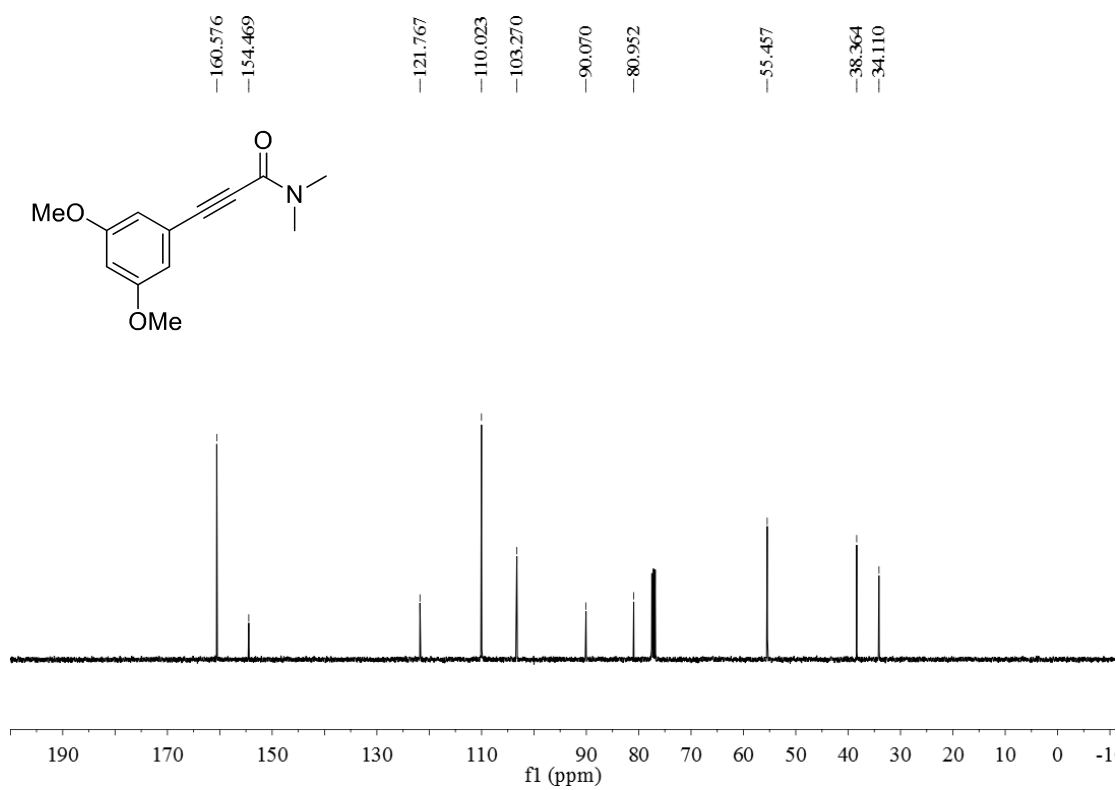

<sup>1</sup>H NMR spectrum (400 MHz, CDCl<sub>3</sub>) of **1j**

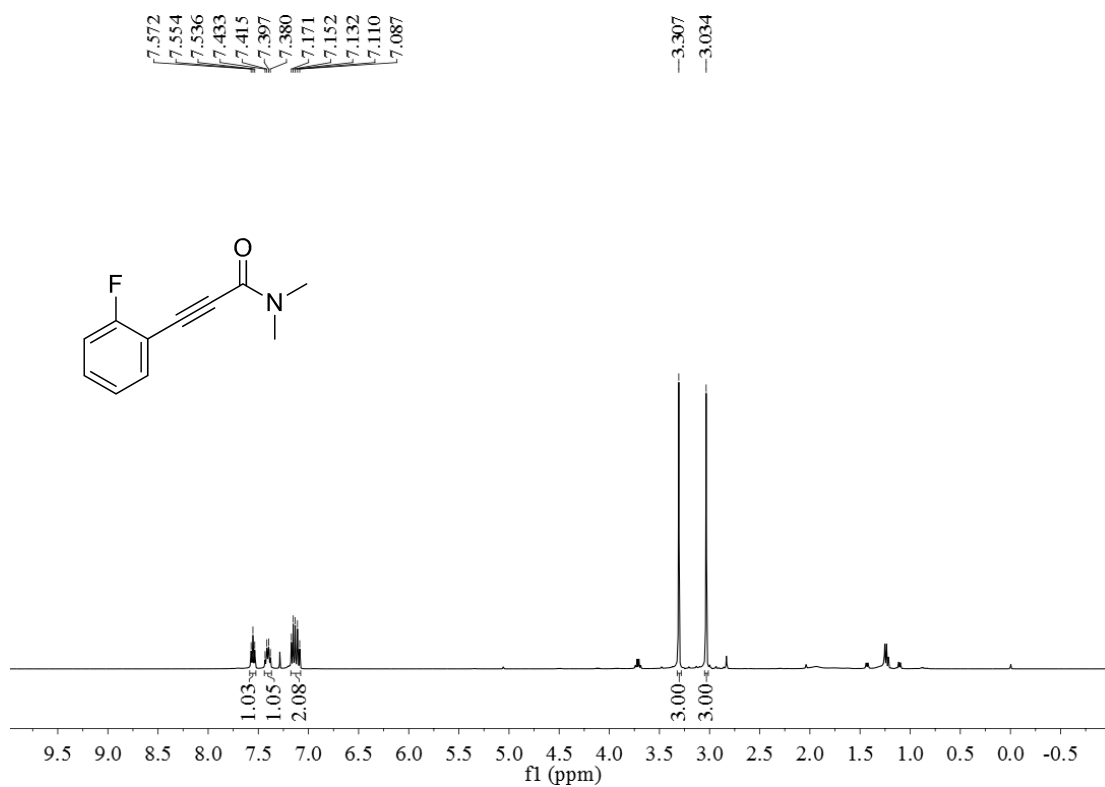

<sup>13</sup>C NMR spectrum (100 MHz, CDCl<sub>3</sub>) of **1j**

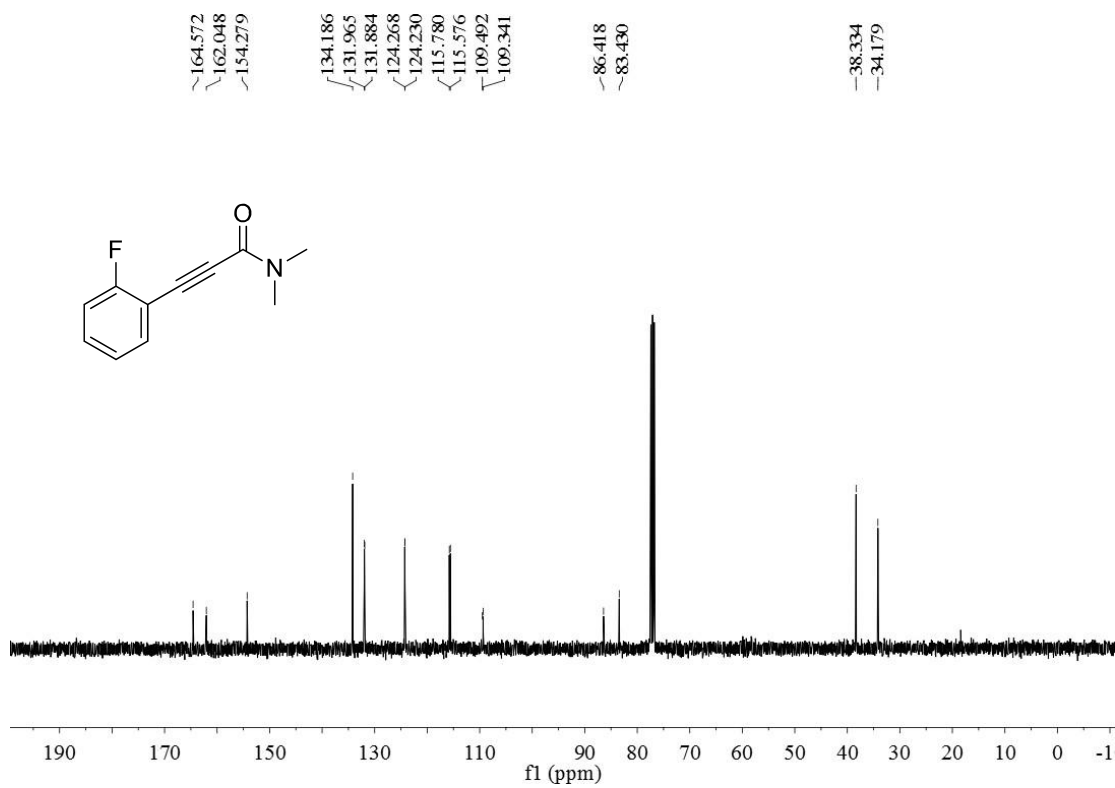

$^{19}\text{F}$  NMR spectrum (376 MHz,  $\text{CDCl}_3$ ) of **1j**

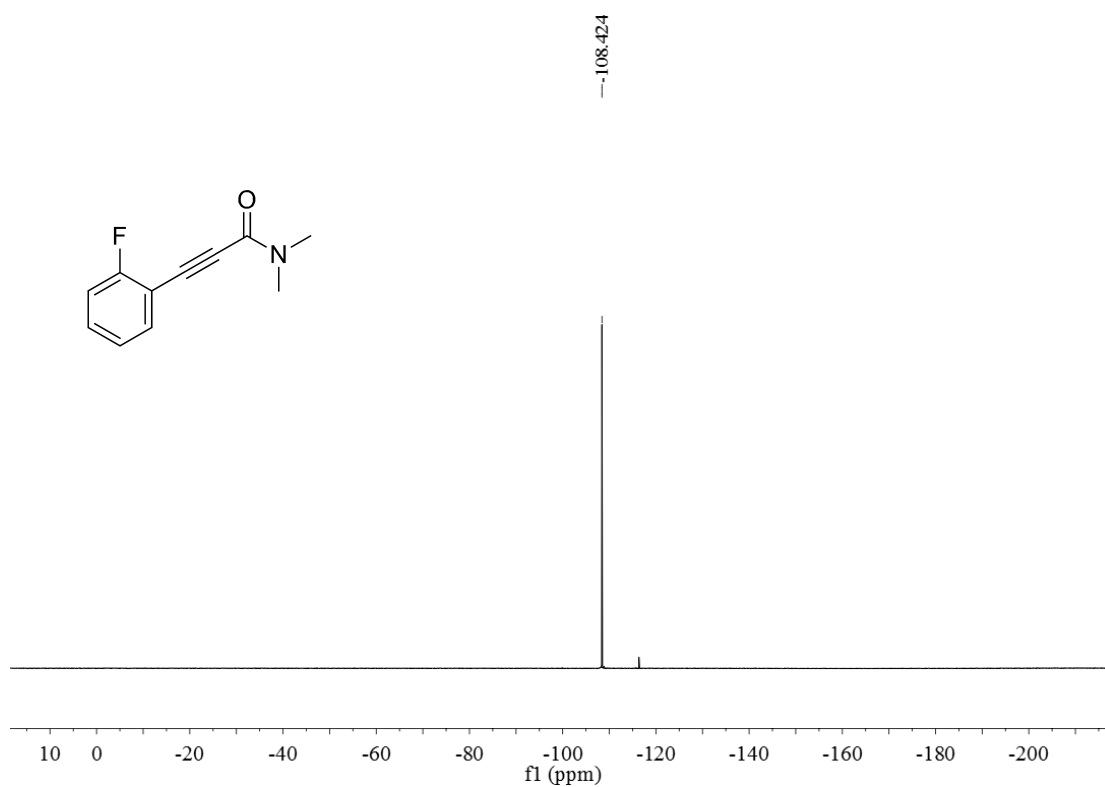

$^1\text{H}$  NMR spectrum (400 MHz,  $\text{CDCl}_3$ ) of **1m**

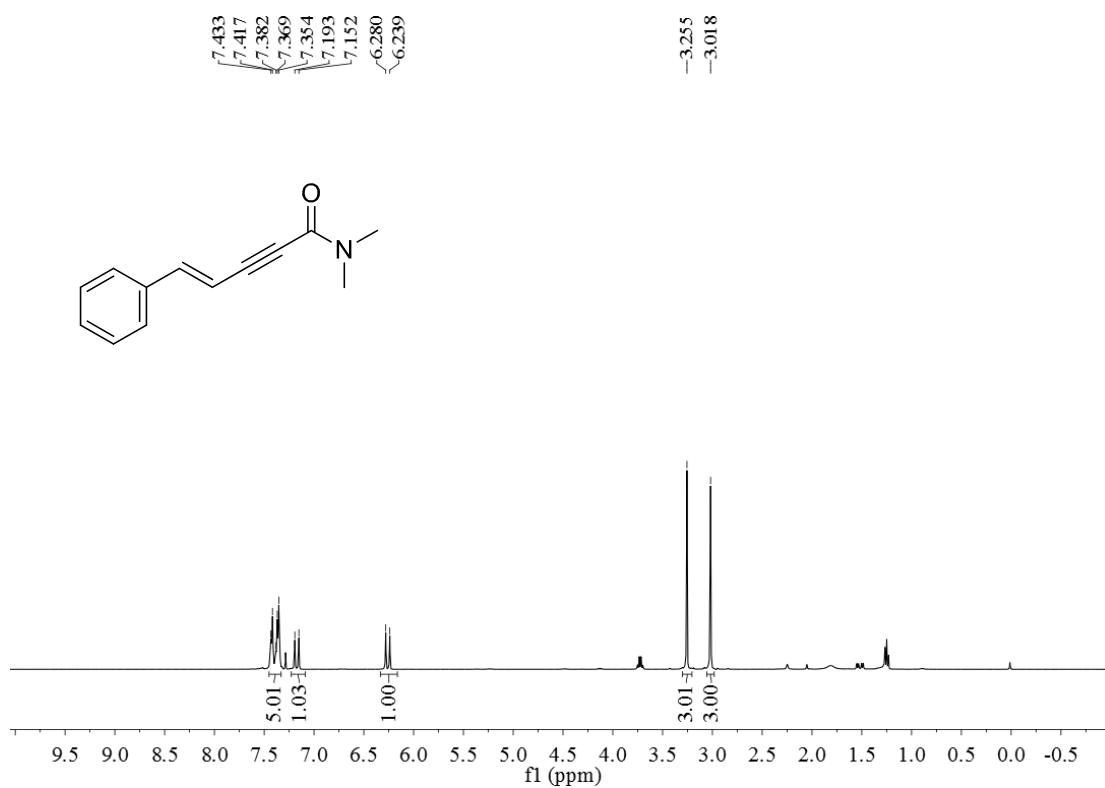

<sup>13</sup>C NMR spectrum (100 MHz, CDCl<sub>3</sub>) of **1m**

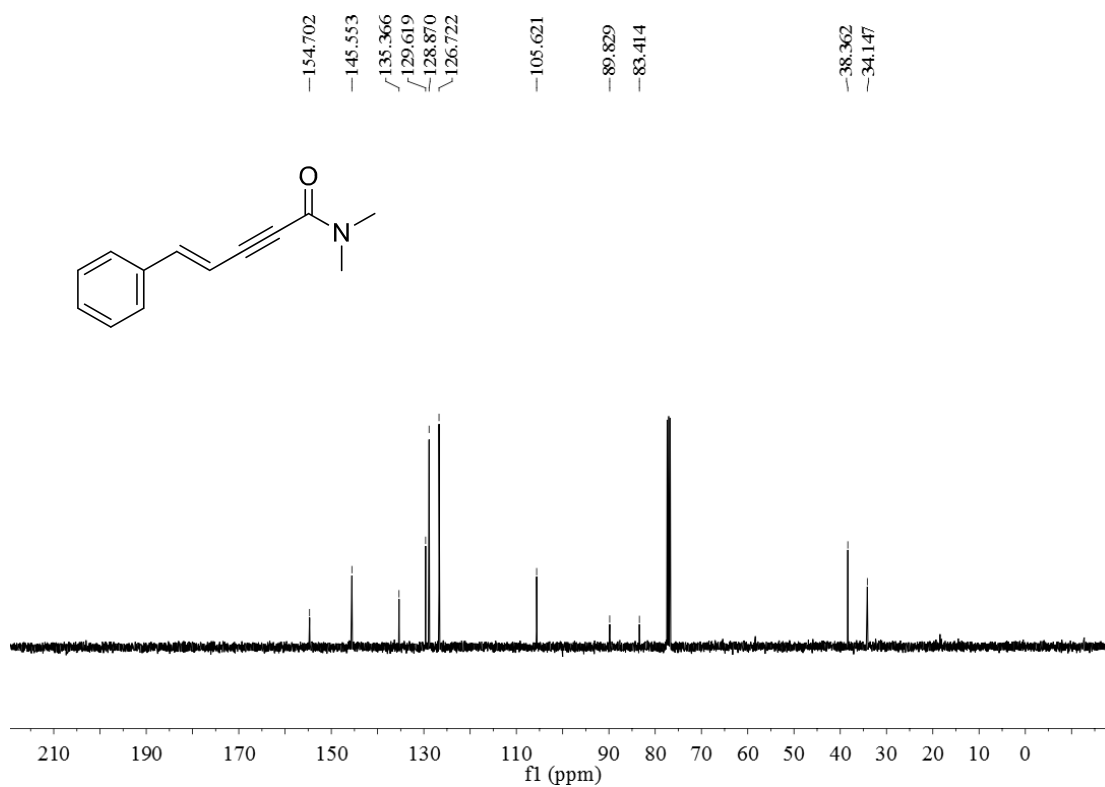

<sup>1</sup>H NMR spectrum (400 MHz, CDCl<sub>3</sub>) of **1o**

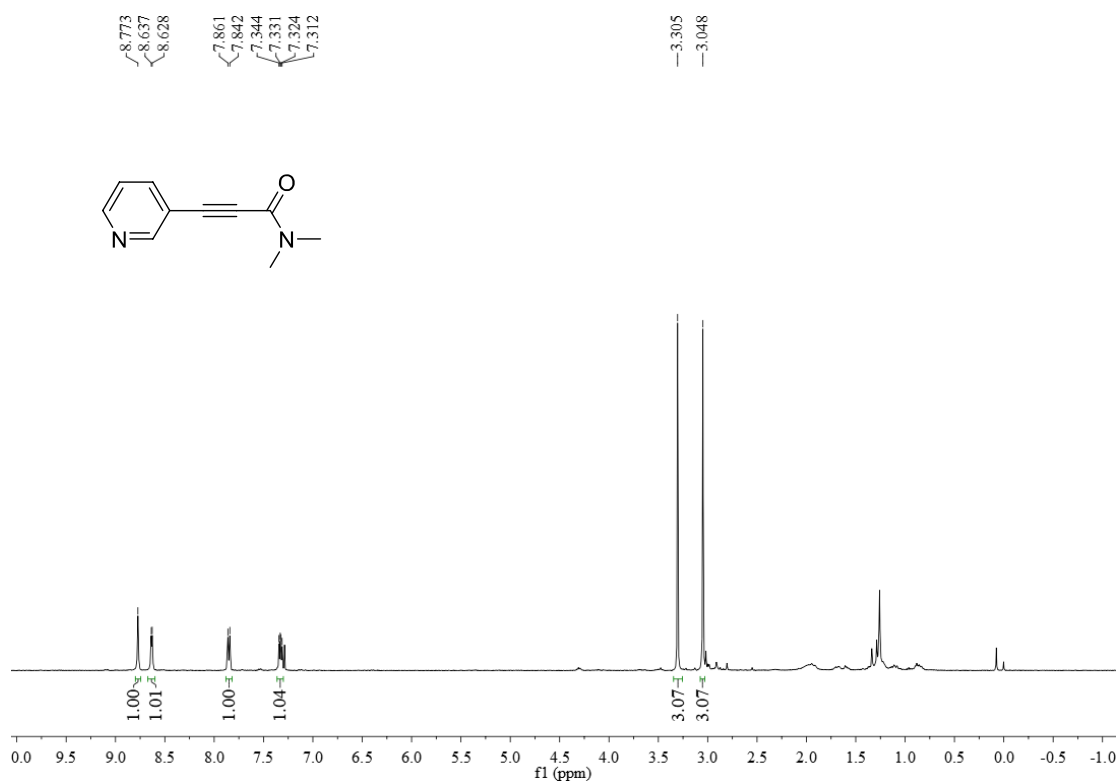

<sup>13</sup>C NMR spectrum (100 MHz, CDCl<sub>3</sub>) of **1o**

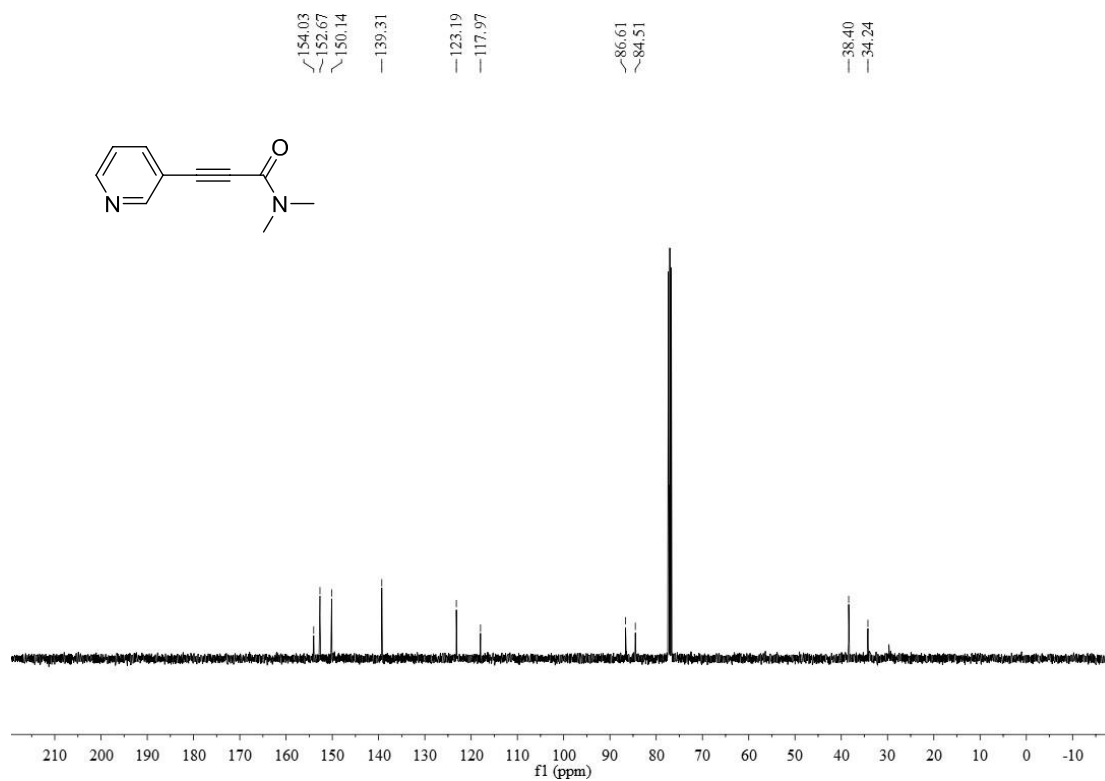

<sup>1</sup>H NMR spectrum (400 MHz, CDCl<sub>3</sub>) of **1v**

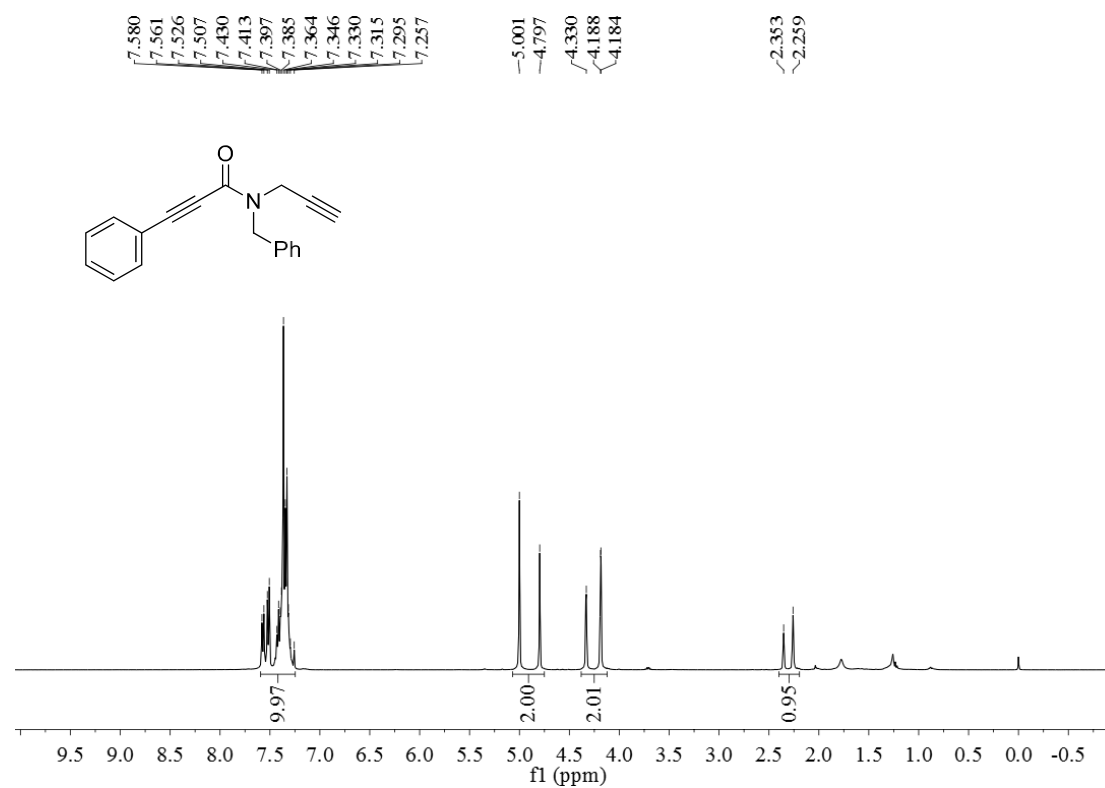



$^{13}\text{C}$  NMR spectrum (100 MHz,  $\text{CDCl}_3$ ) of **1v**

154.267  
135.578  
132.540  
130.324  
128.944  
128.785  
128.599  
128.188  
127.900  
120.197  
-91.105  
-81.275  
-80.935  
-73.236  
-72.597  
-51.589  
-46.777  
-37.654  
-32.544

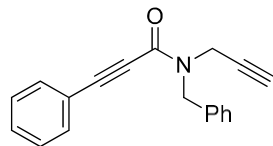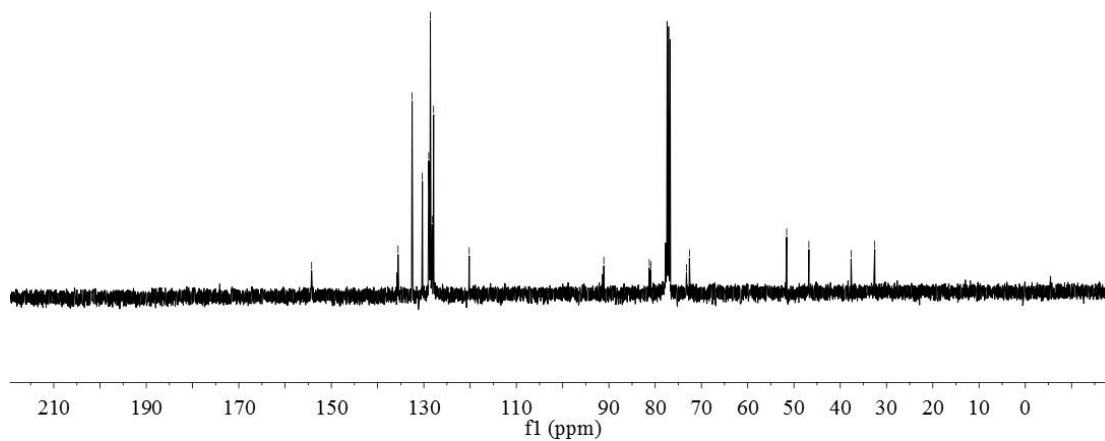

$^1\text{H}$  NMR spectrum (400 MHz,  $\text{CDCl}_3$ ) of **2a**

7.352  
7.333  
7.308  
7.282  
7.265  
6.652  
6.621  
6.049  
6.018  
-2.973  
-2.823

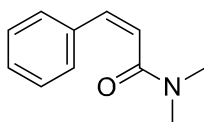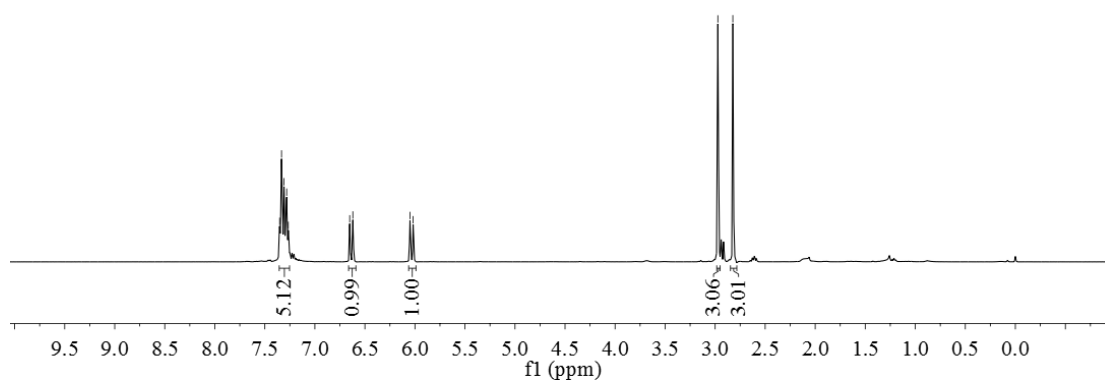

<sup>13</sup>C NMR spectrum (100 MHz, CDCl<sub>3</sub>) of **2a**

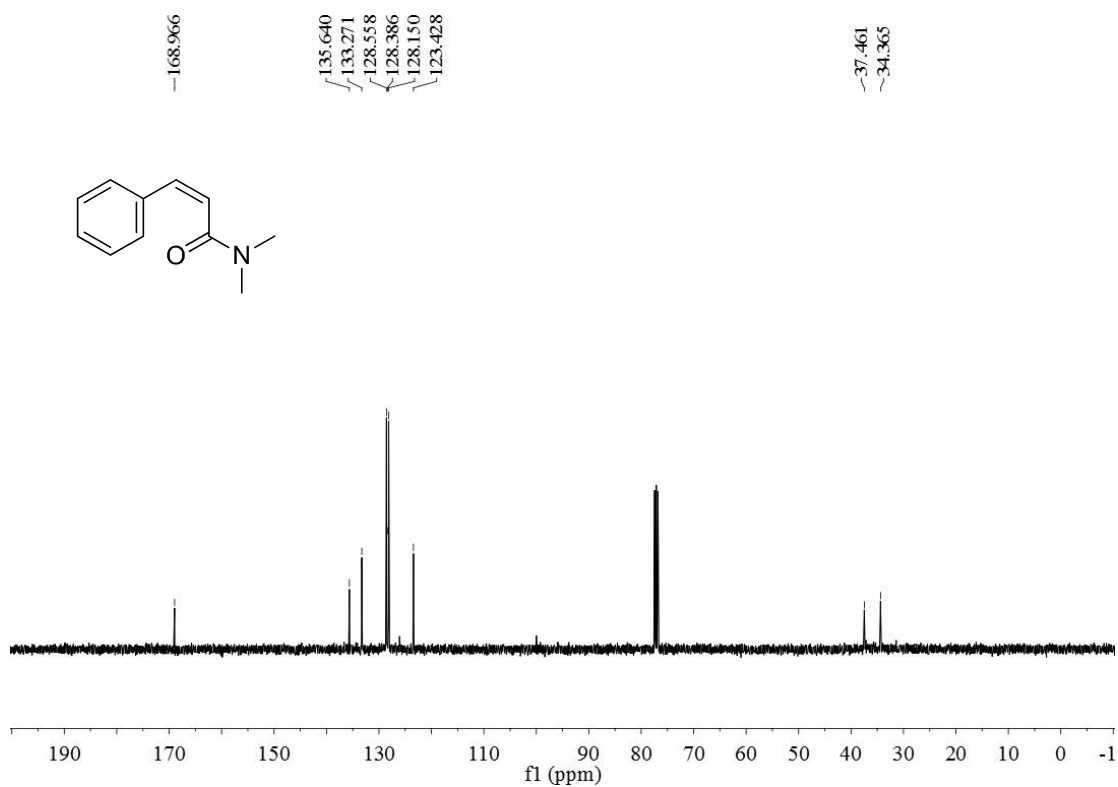

<sup>1</sup>H NMR spectrum (400 MHz, CDCl<sub>3</sub>) of **2b**

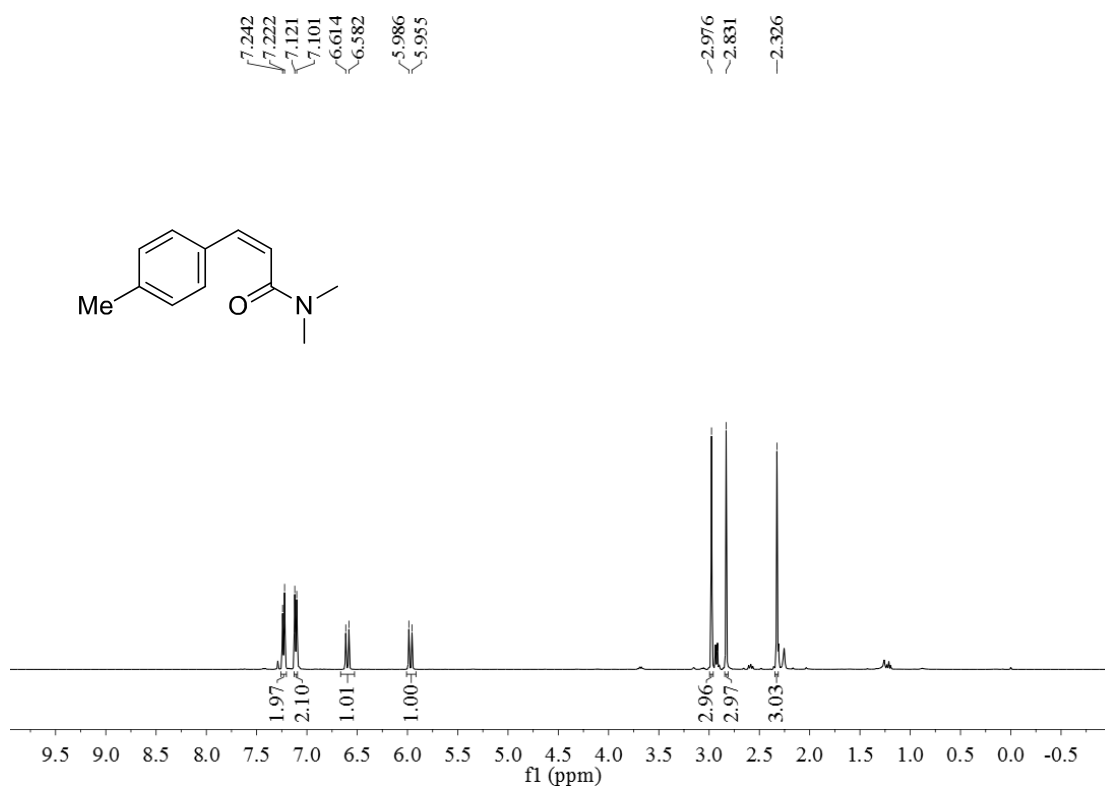

<sup>13</sup>C NMR spectrum (100 MHz, CDCl<sub>3</sub>) of **2b**

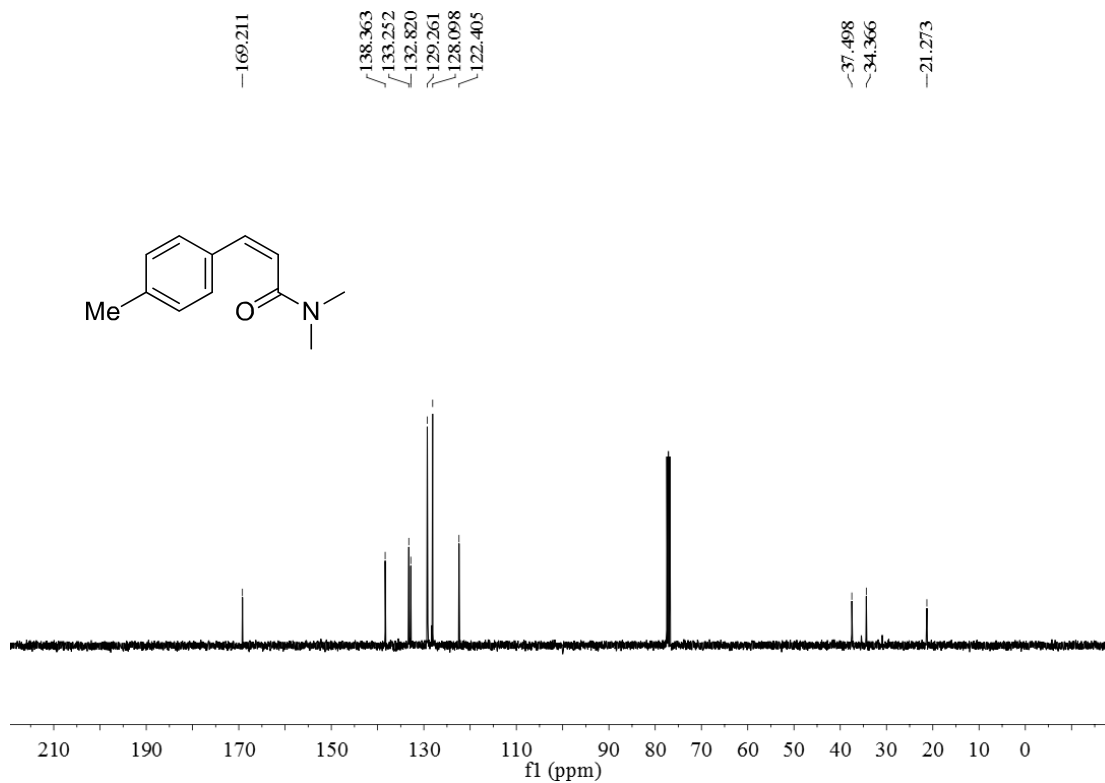

<sup>1</sup>H NMR spectrum (400 MHz, CDCl<sub>3</sub>) of **2c**

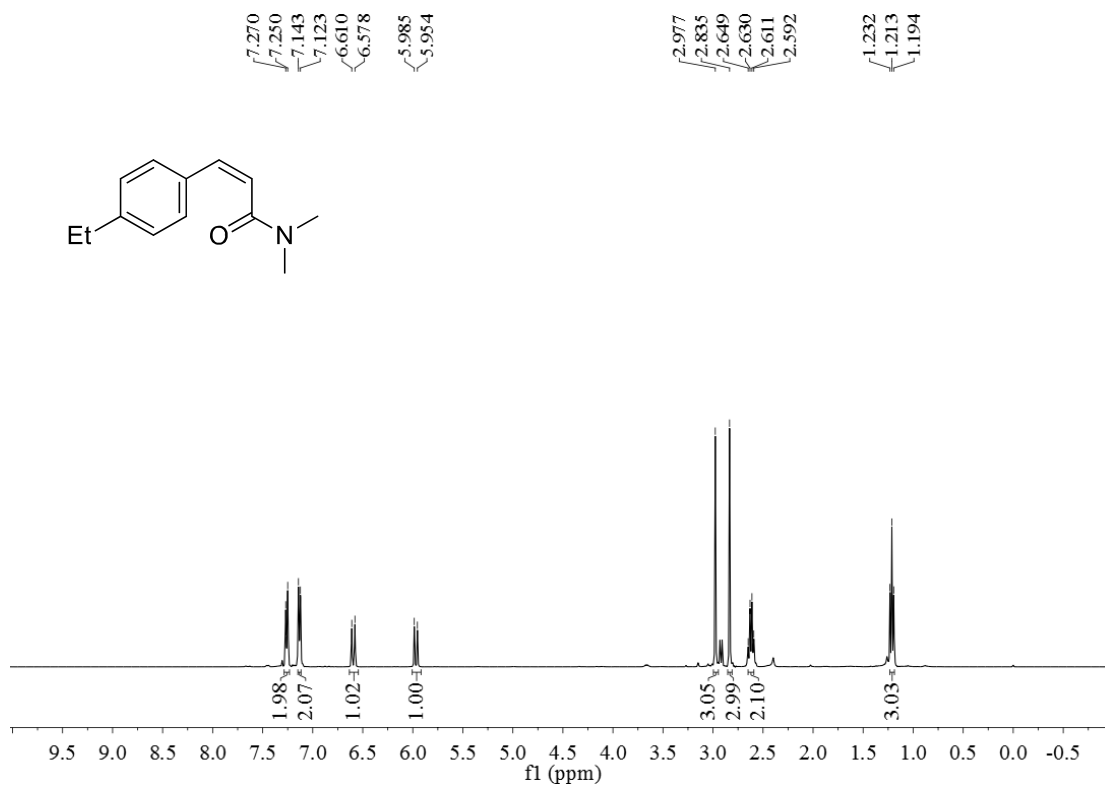

<sup>13</sup>C NMR spectrum (100 MHz, CDCl<sub>3</sub>) of **2c**

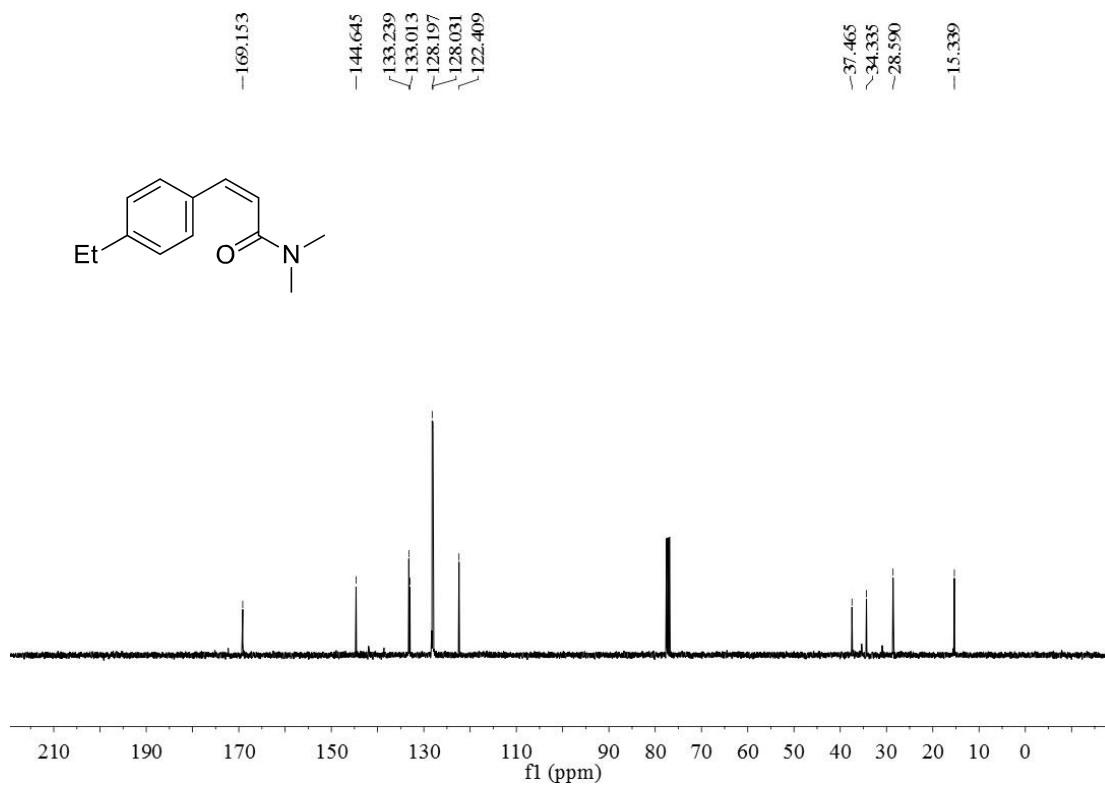

<sup>1</sup>H NMR spectrum (400 MHz, CDCl<sub>3</sub>) of **2d**

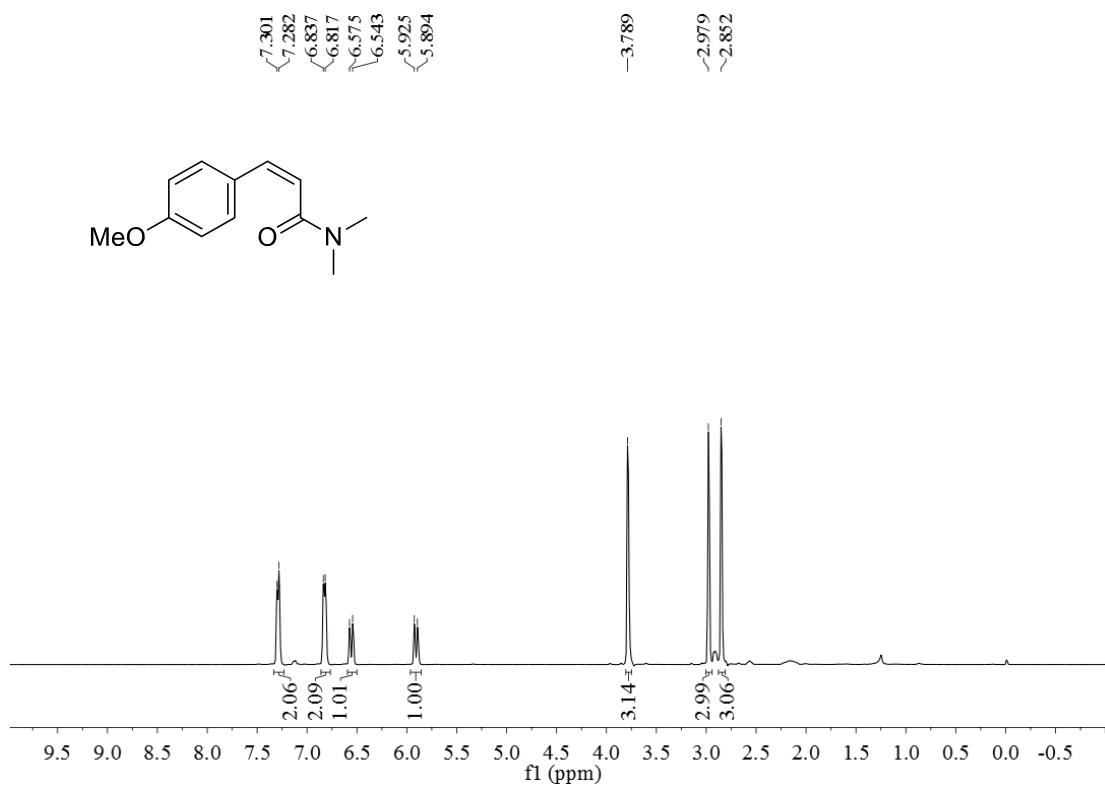

<sup>13</sup>C NMR spectrum (100 MHz, CDCl<sub>3</sub>) of **2d**

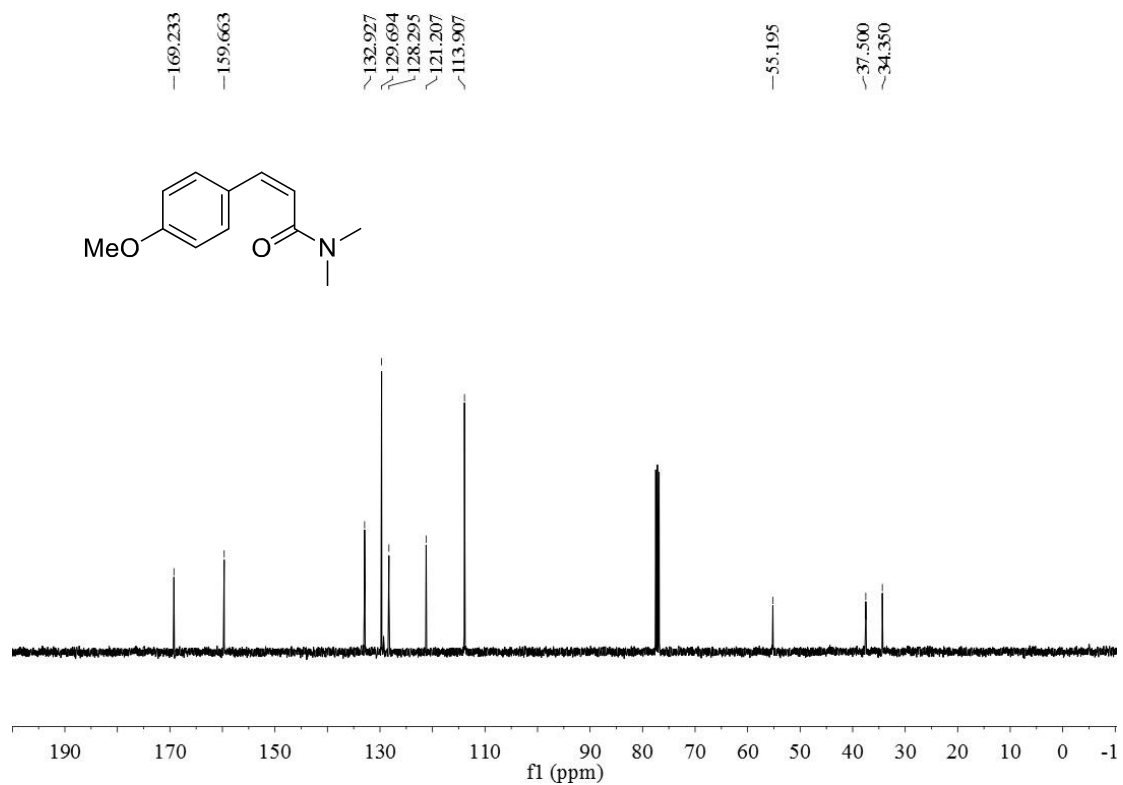

<sup>1</sup>H NMR spectrum (400 MHz, CDCl<sub>3</sub>) of **2e**

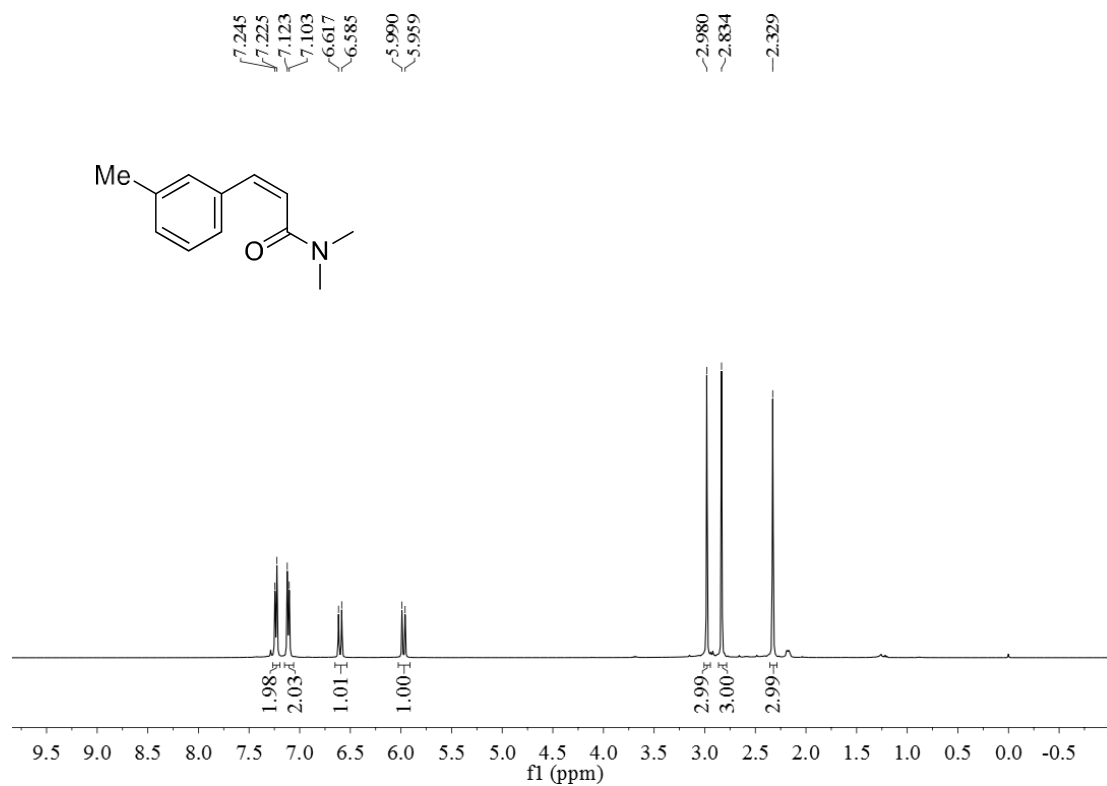

$^{13}\text{C}$  NMR spectrum (100 MHz,  $\text{CDCl}_3$ ) of **2e**

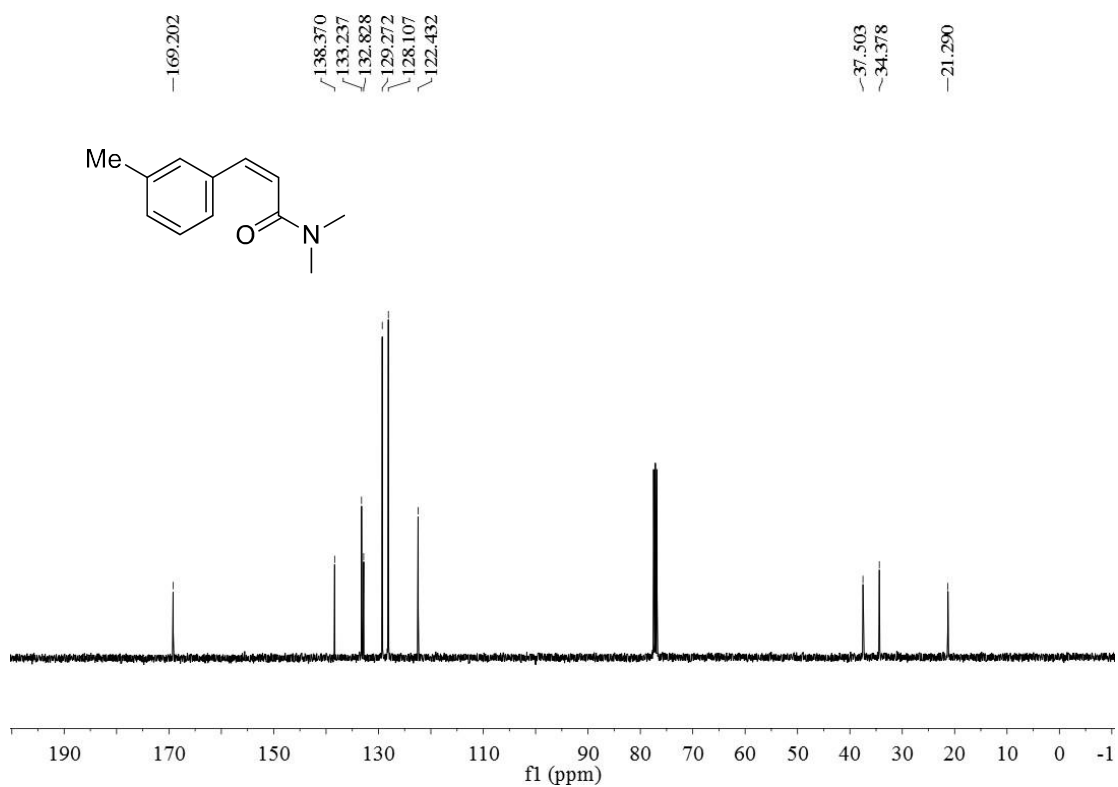

$^1\text{H}$  NMR spectrum (400 MHz,  $\text{CDCl}_3$ ) of **2f**

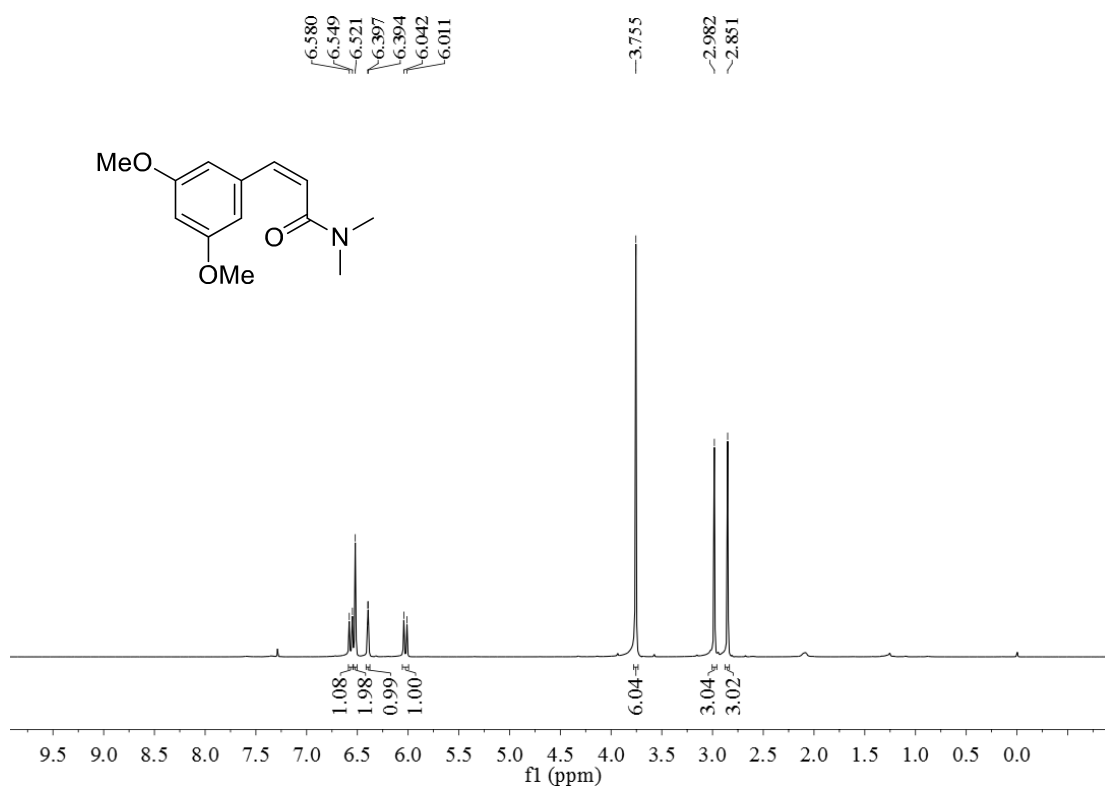

$^{13}\text{C}$  NMR spectrum (100 MHz,  $\text{CDCl}_3$ ) of **2f**

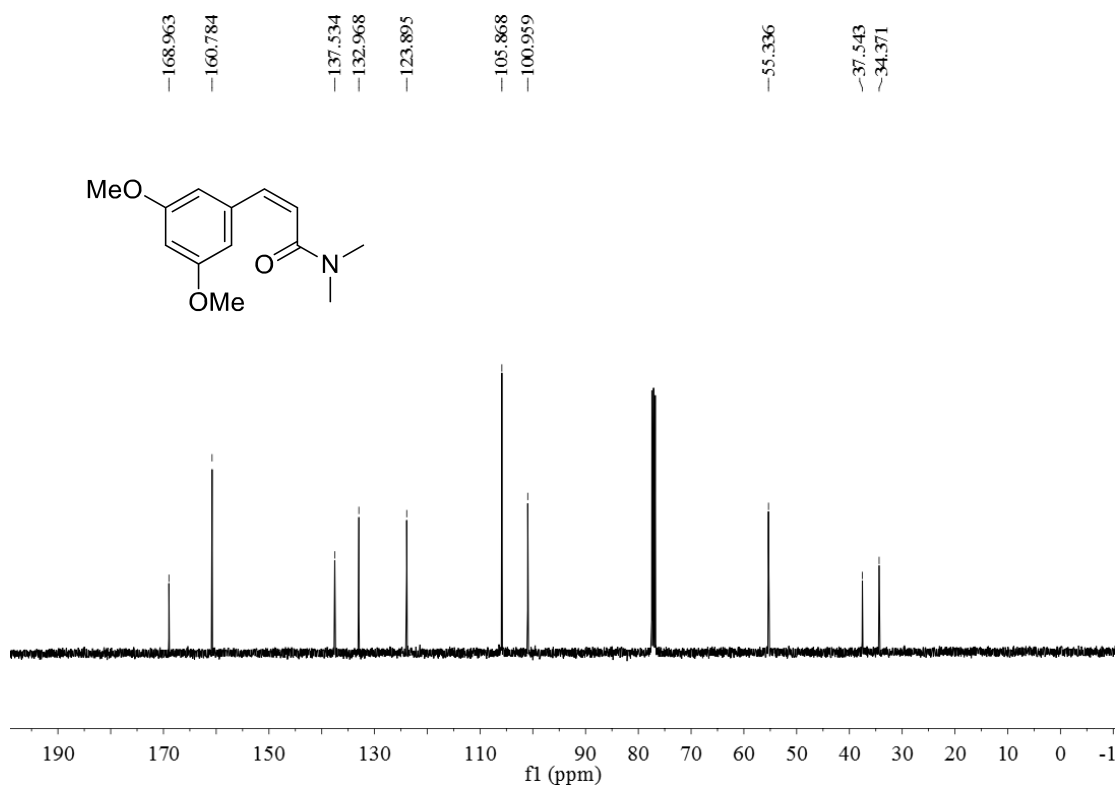

$^1\text{H}$  NMR spectrum (400 MHz,  $\text{CDCl}_3$ ) of **2g**

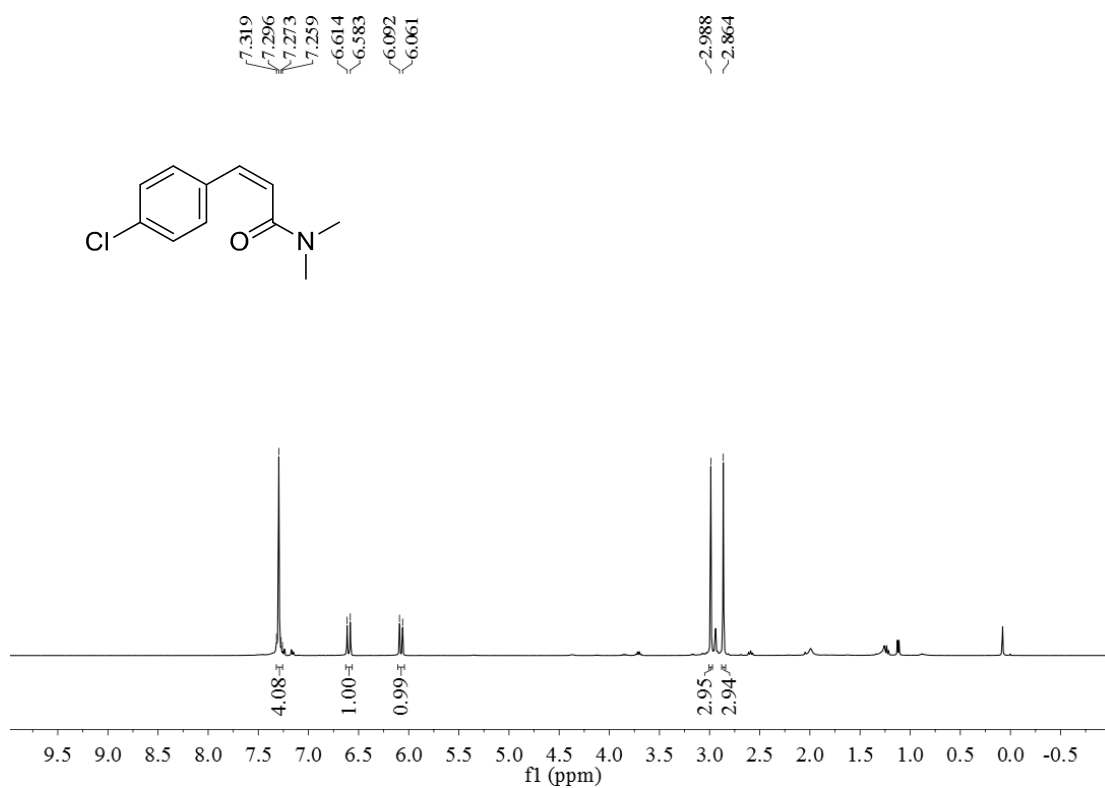

$^{13}\text{C}$  NMR spectrum (100 MHz,  $\text{CDCl}_3$ ) of **2g**

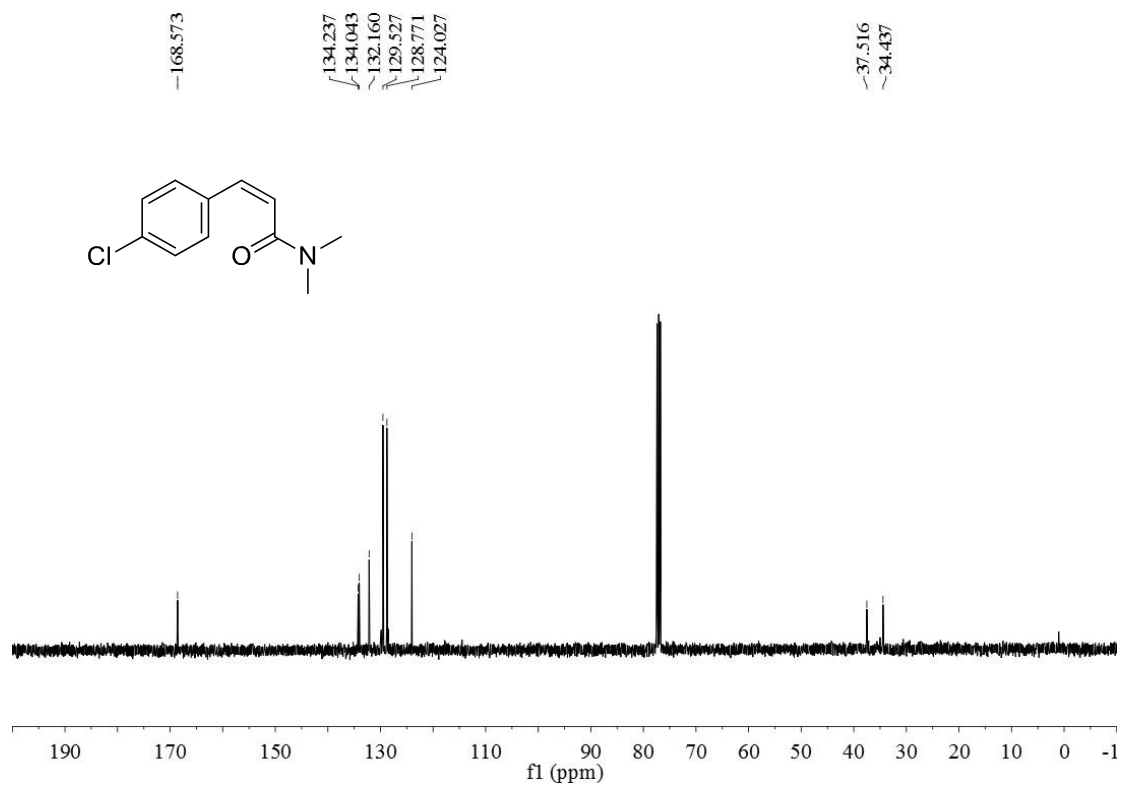

$^1\text{H}$  NMR spectrum (400 MHz,  $\text{CDCl}_3$ ) of **2h**

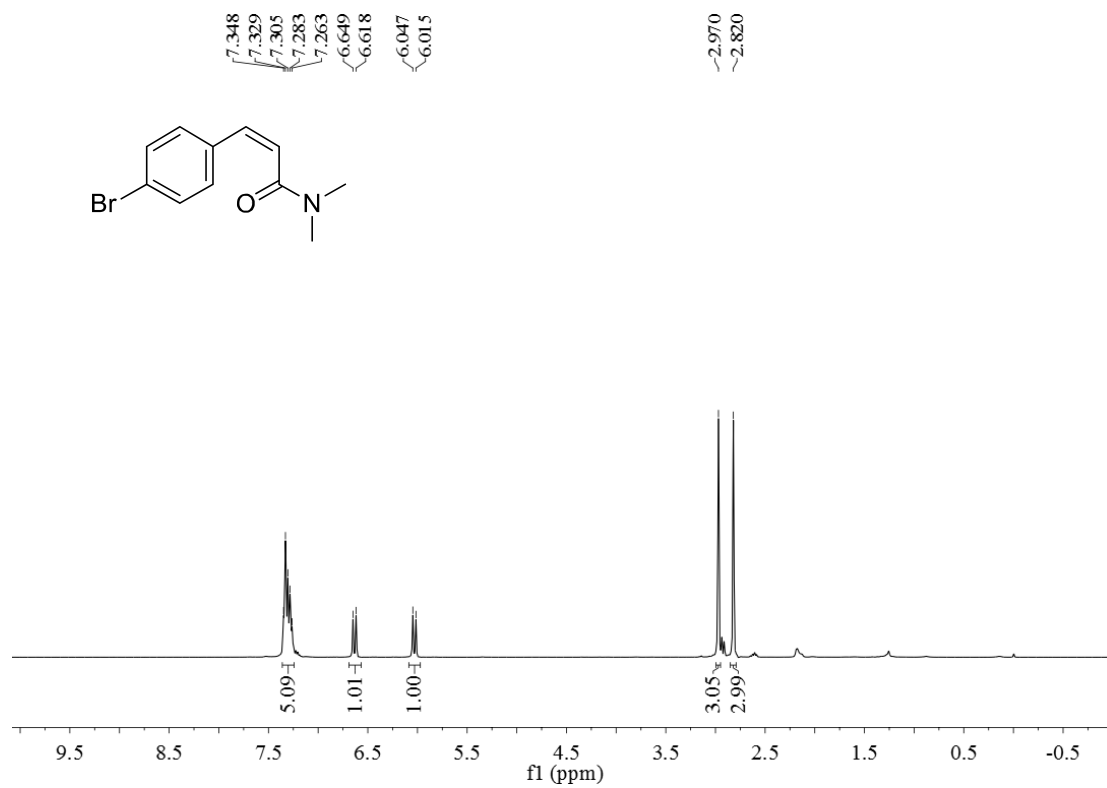



$^{13}\text{C}$  NMR spectrum (100 MHz,  $\text{CDCl}_3$ ) of **2h**

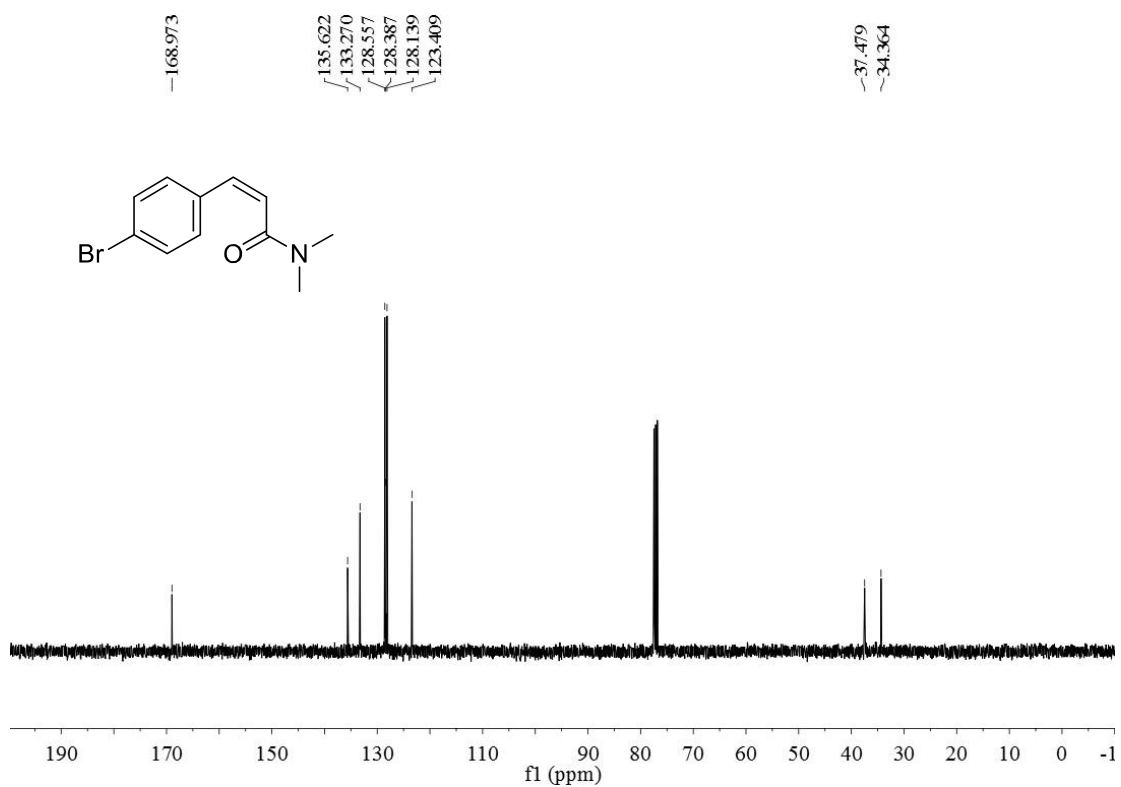

$^1\text{H}$  NMR spectrum (400 MHz,  $\text{CDCl}_3$ ) of **2i**

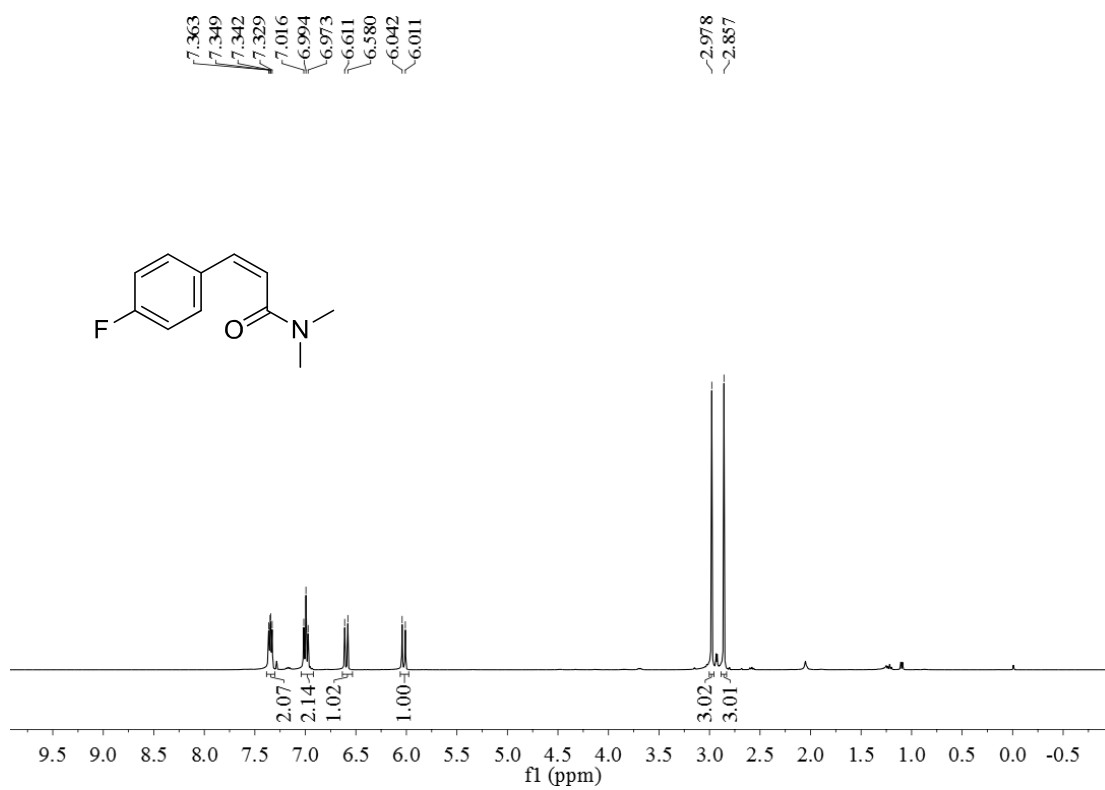

$^{13}\text{C}$  NMR spectrum (100 MHz,  $\text{CDCl}_3$ ) of **2i**

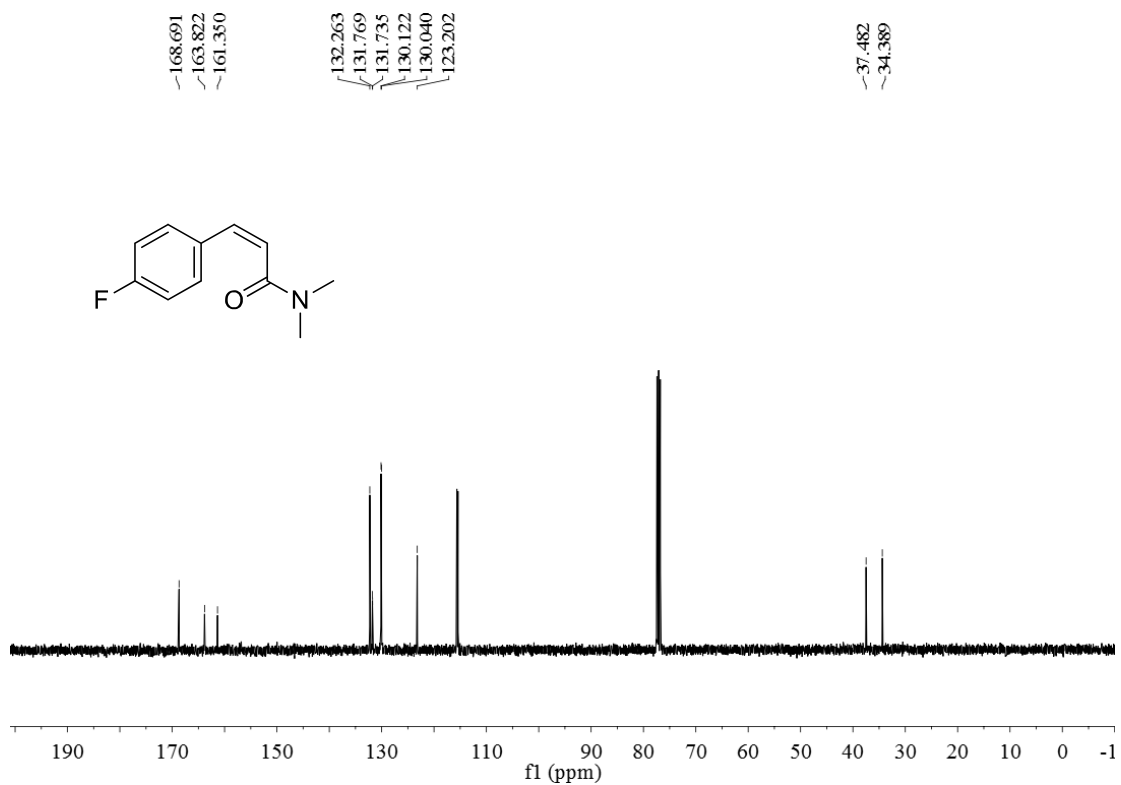

$^{19}\text{F}$  NMR spectrum (376 MHz,  $\text{CDCl}_3$ ) of **2i**

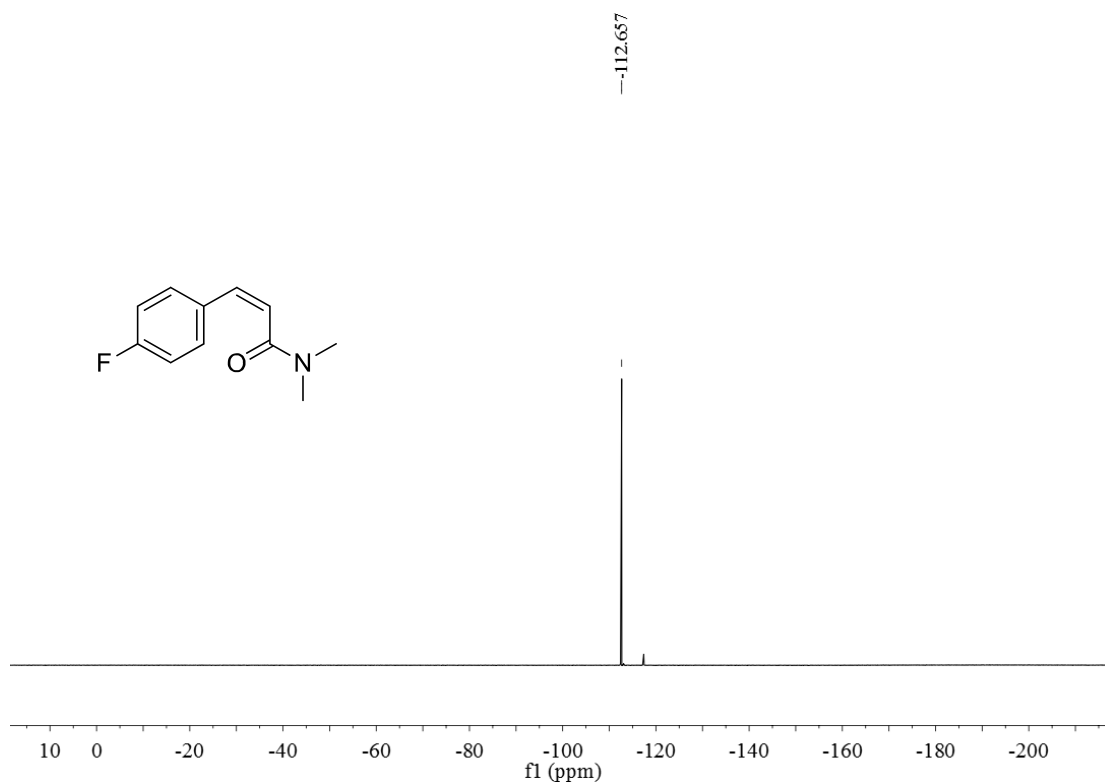

<sup>1</sup>H NMR spectrum (400 MHz, CDCl<sub>3</sub>) of **2j**

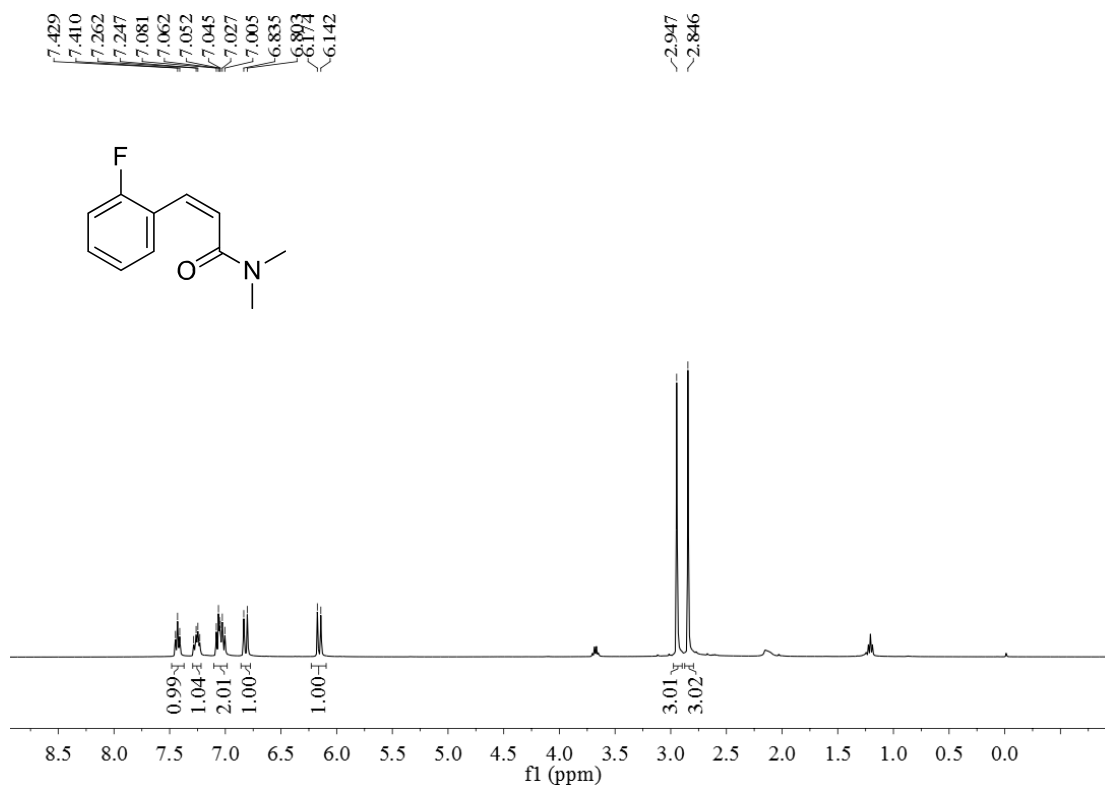

<sup>13</sup>C NMR spectrum (100 MHz, CDCl<sub>3</sub>) of **2j**

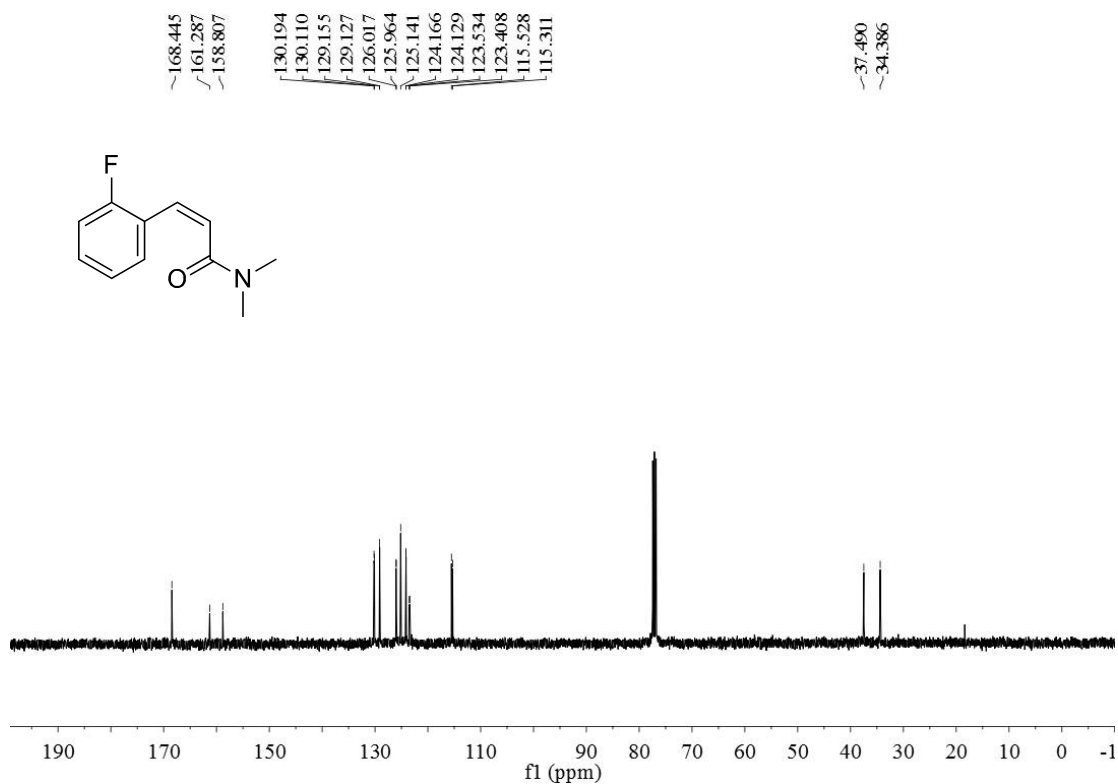

$^{19}\text{F}$  NMR spectrum (376 MHz,  $\text{CDCl}_3$ ) of **2j**

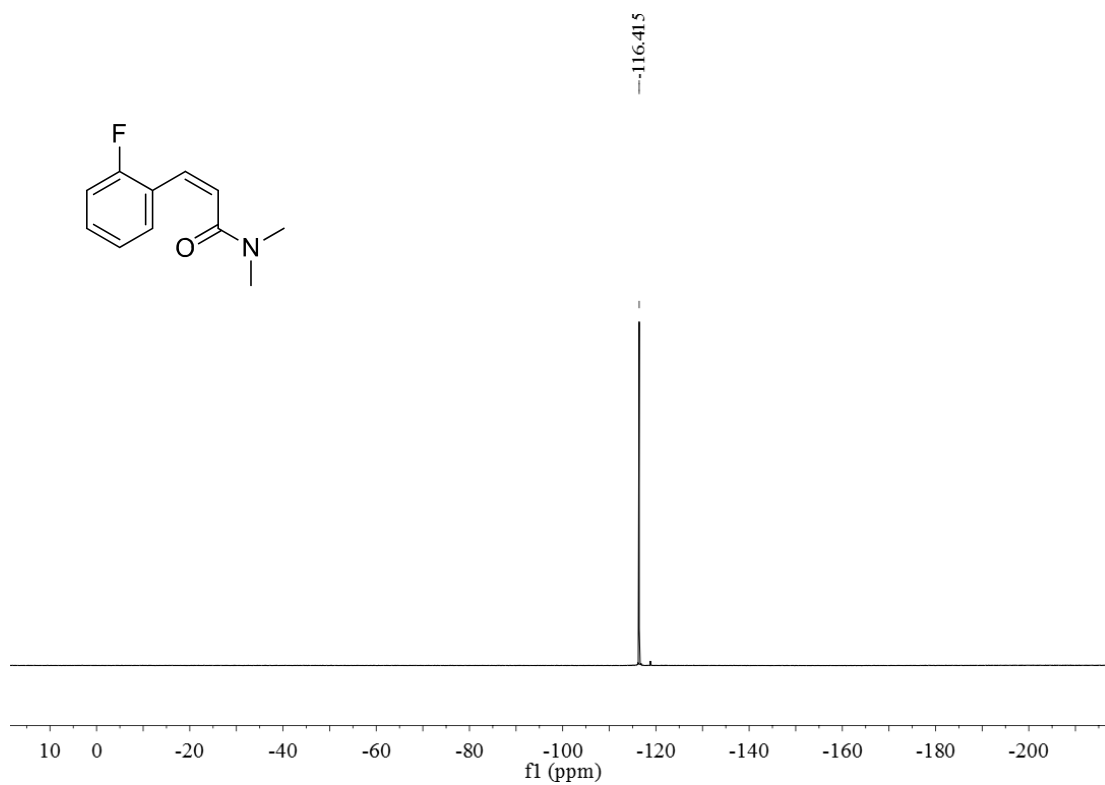

$^1\text{H}$  NMR spectrum (400 MHz,  $\text{CDCl}_3$ ) of **2k**

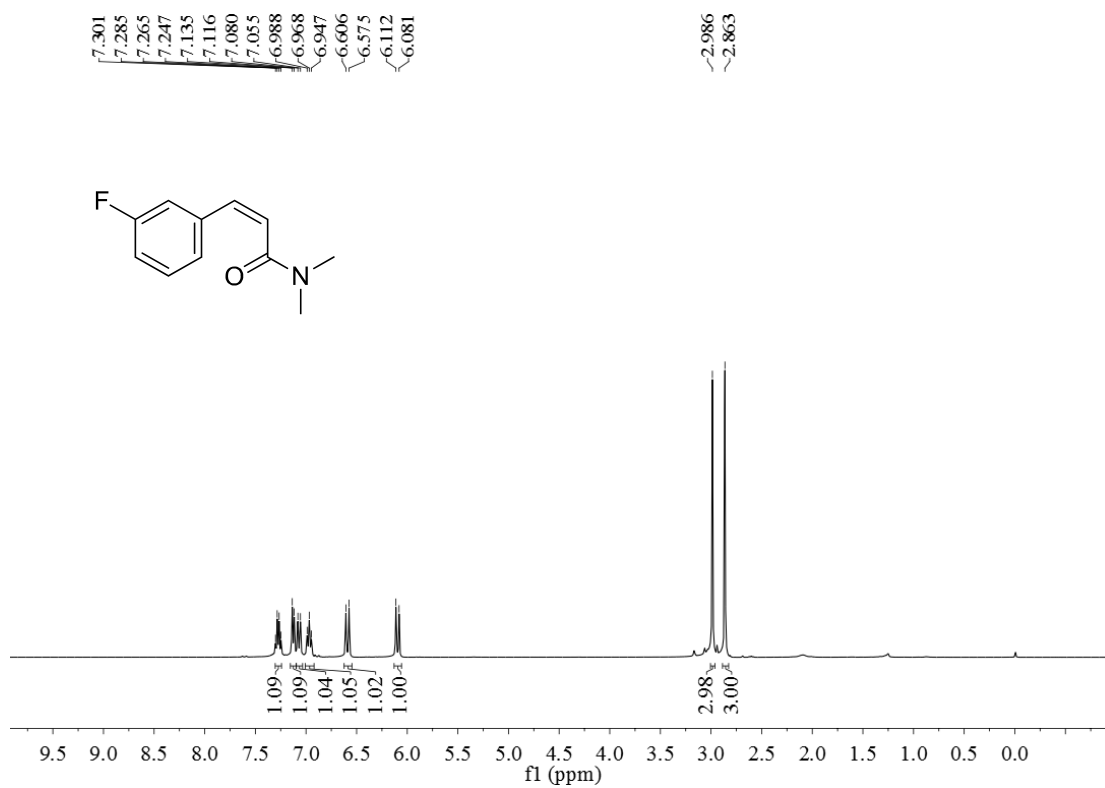

<sup>13</sup>C NMR spectrum (100 MHz, CDCl<sub>3</sub>) of **2k**

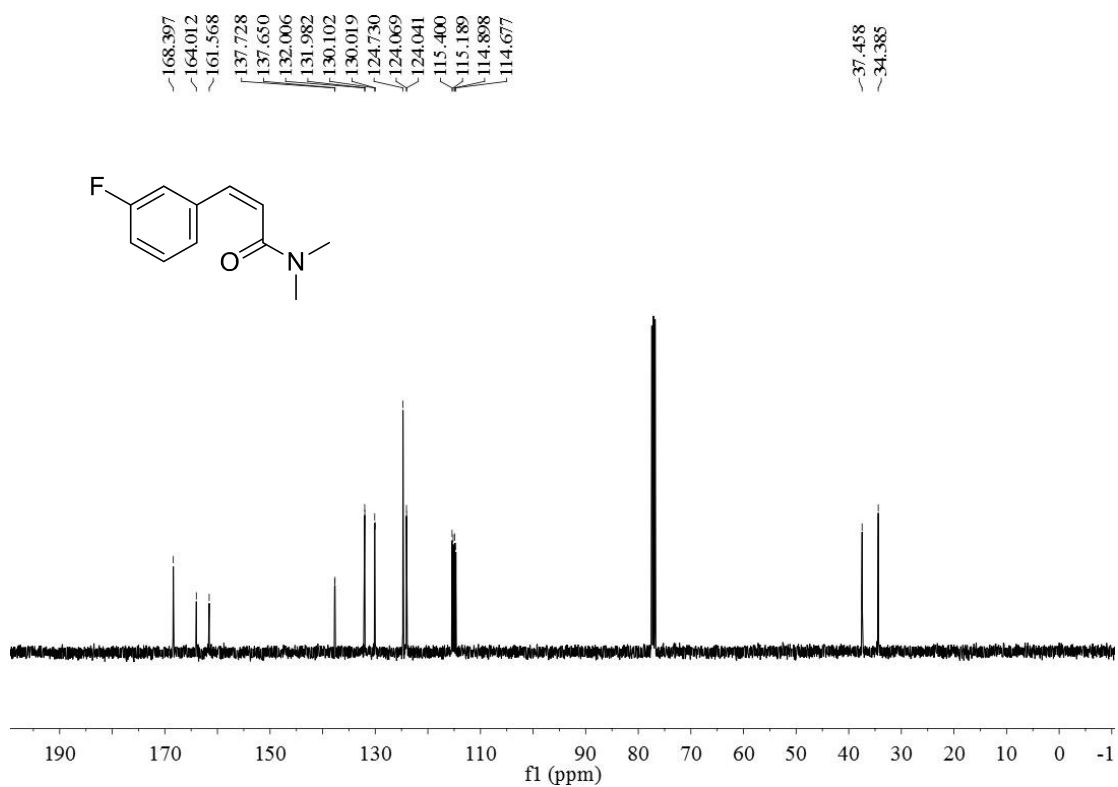

<sup>19</sup>F NMR spectrum (376 MHz, CDCl<sub>3</sub>) of **2k**

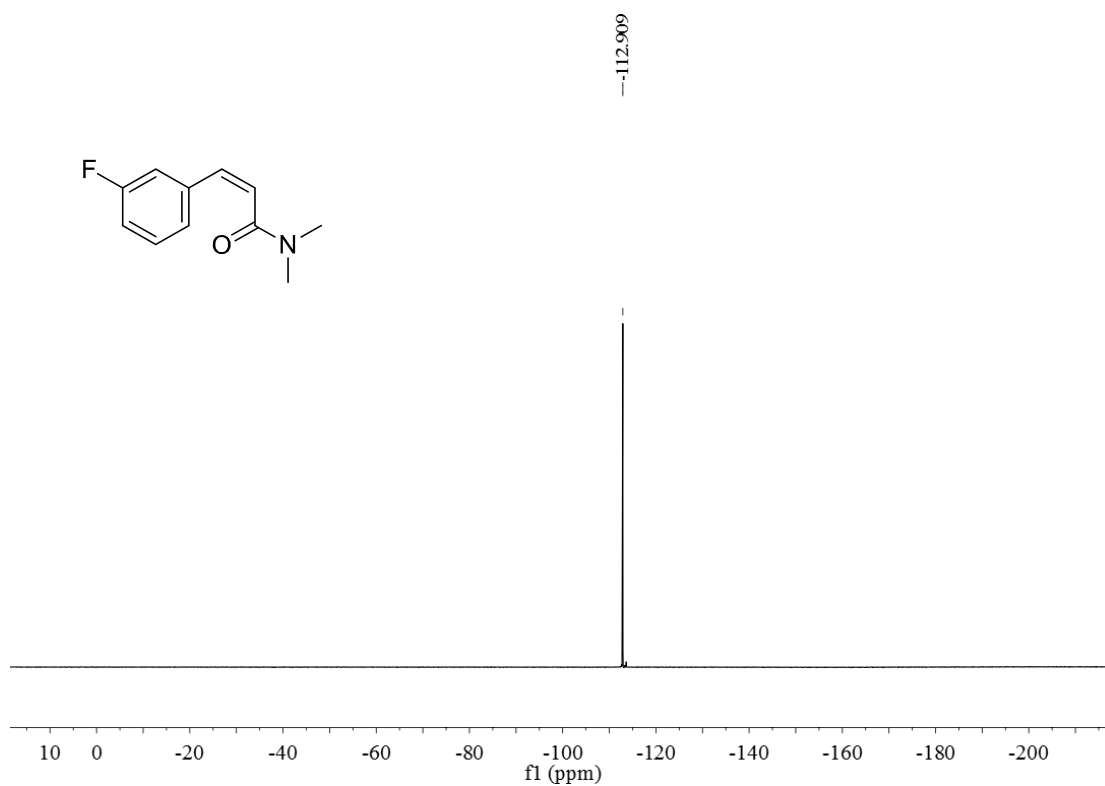

<sup>1</sup>H NMR spectrum (400 MHz, CDCl<sub>3</sub>) of **21**

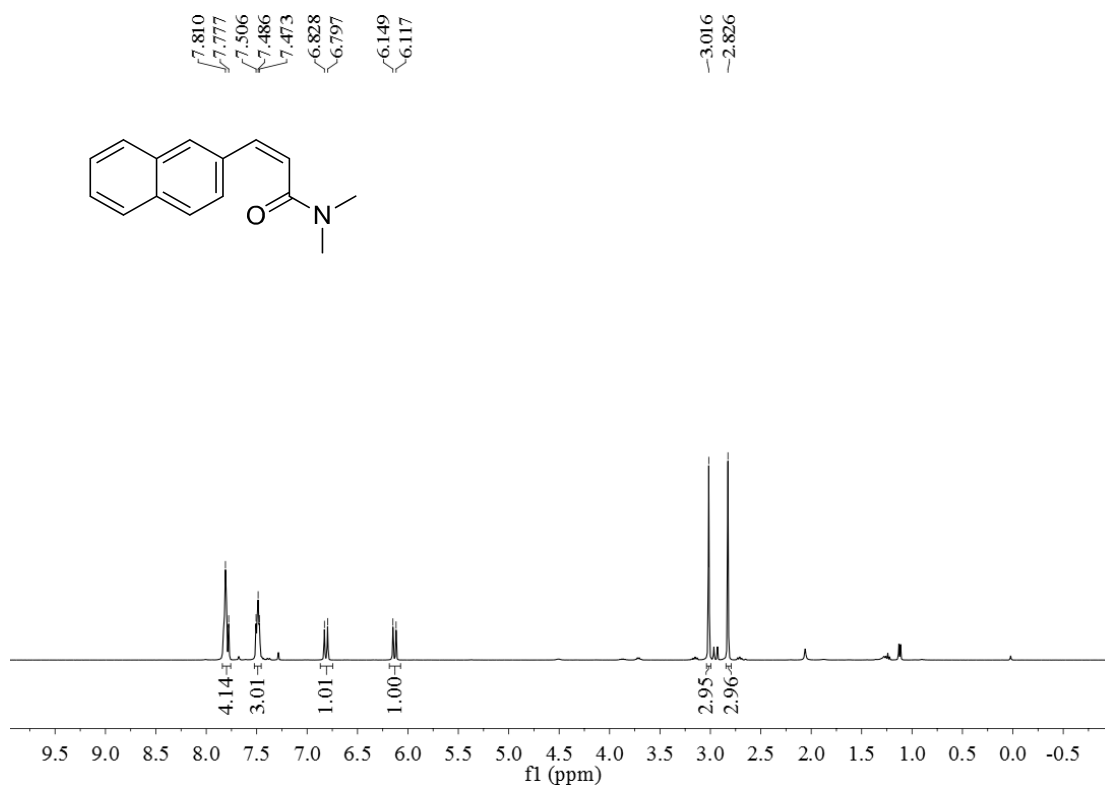

<sup>13</sup>C NMR spectrum (100 MHz, CDCl<sub>3</sub>) of **21**

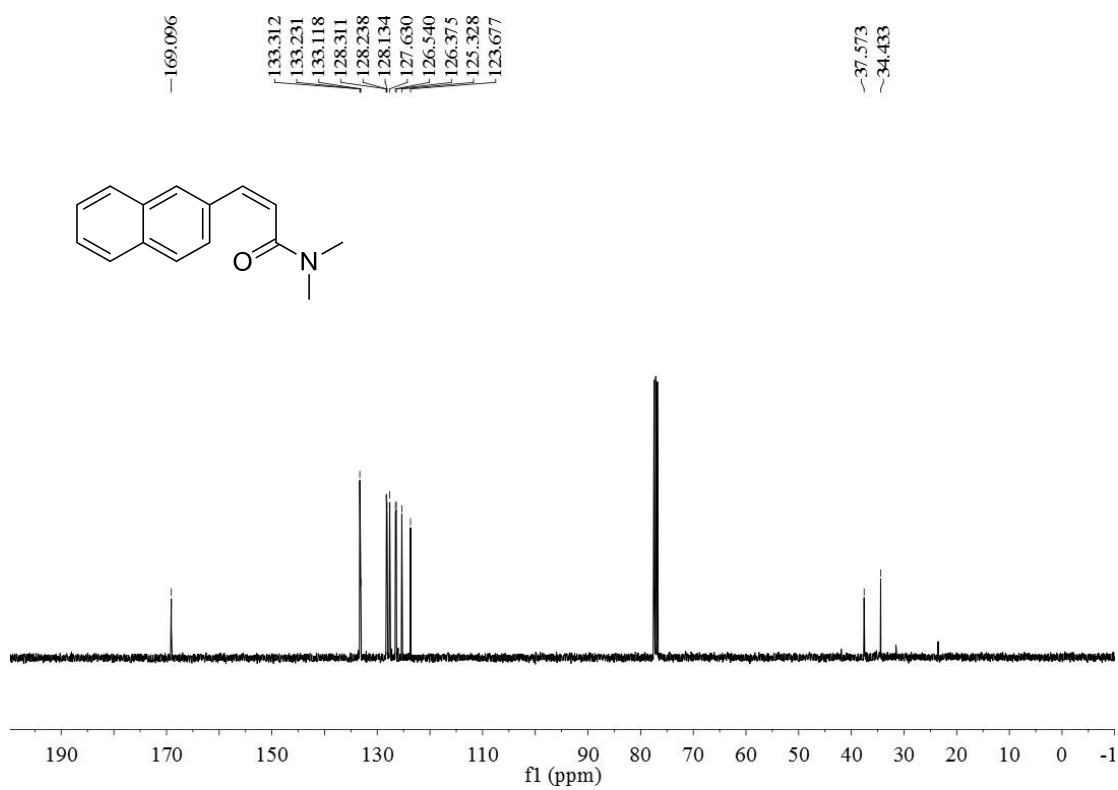

<sup>1</sup>H NMR spectrum (400 MHz, CDCl<sub>3</sub>) of **2m**

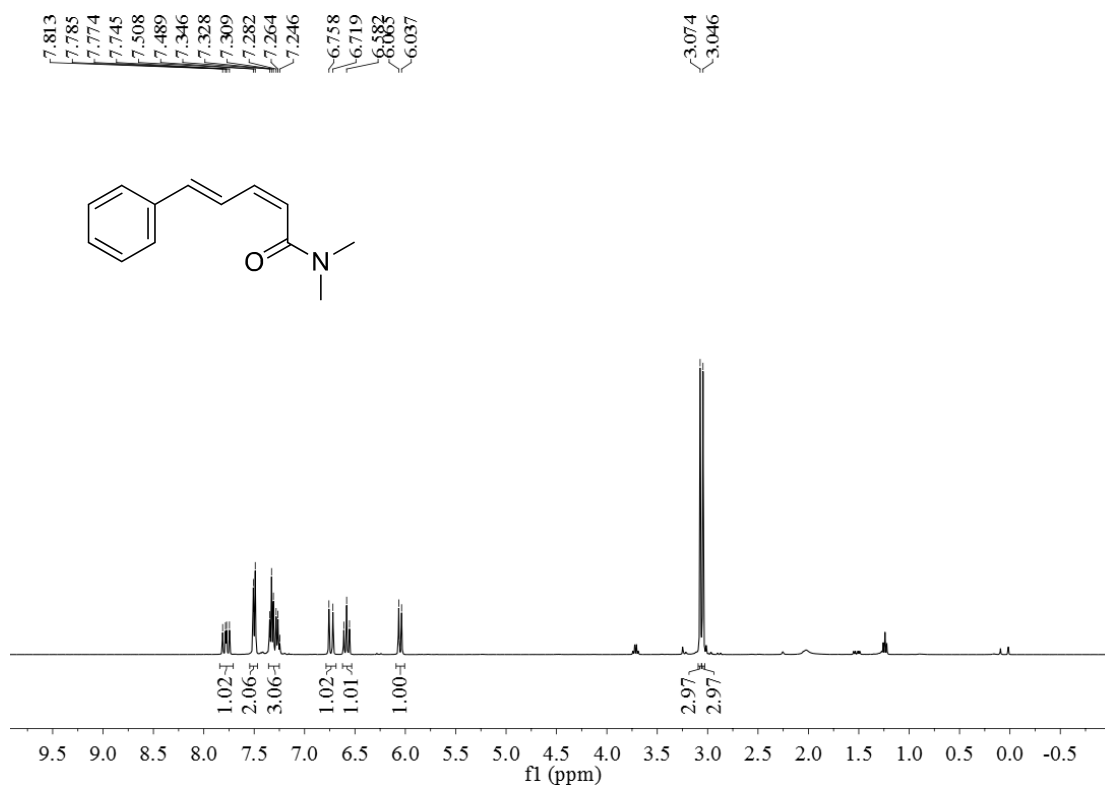

<sup>13</sup>C NMR spectrum (100 MHz, CDCl<sub>3</sub>) of **2m**

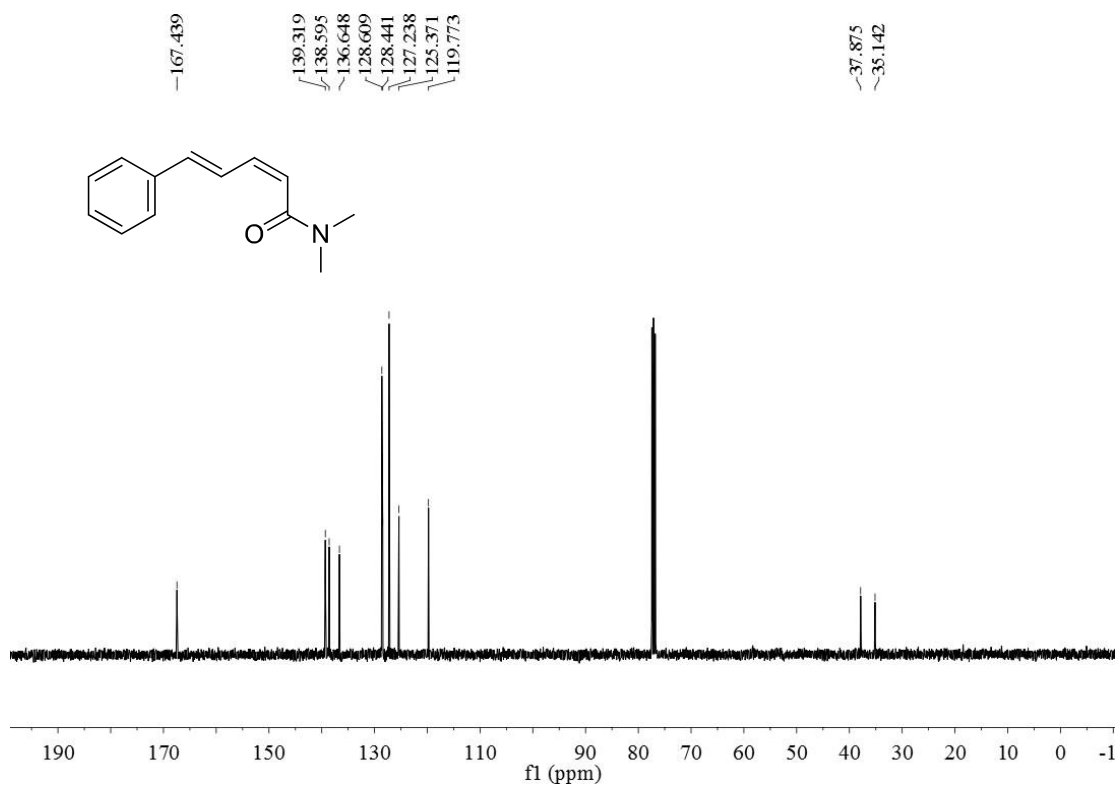

<sup>1</sup>H NMR spectrum (400 MHz, CDCl<sub>3</sub>) of **2n**

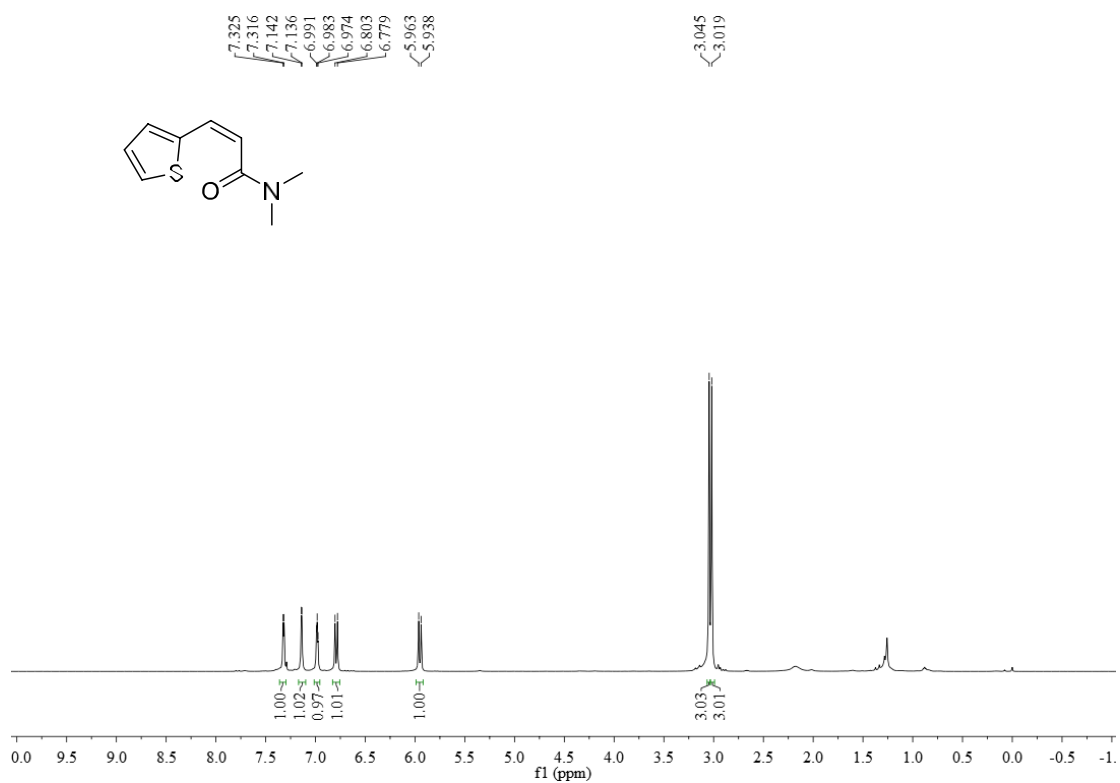

<sup>13</sup>C NMR spectrum (100 MHz, CDCl<sub>3</sub>) of **2n**

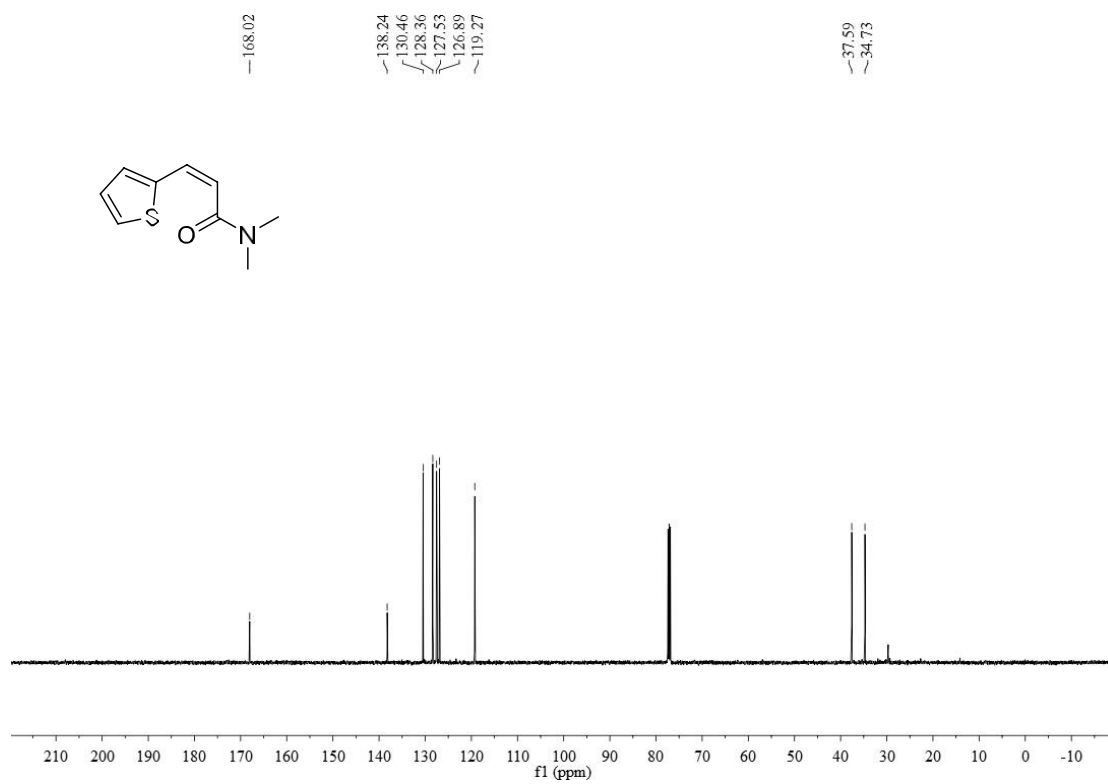



<sup>1</sup>H NMR spectrum (400 MHz, CDCl<sub>3</sub>) of **2o**

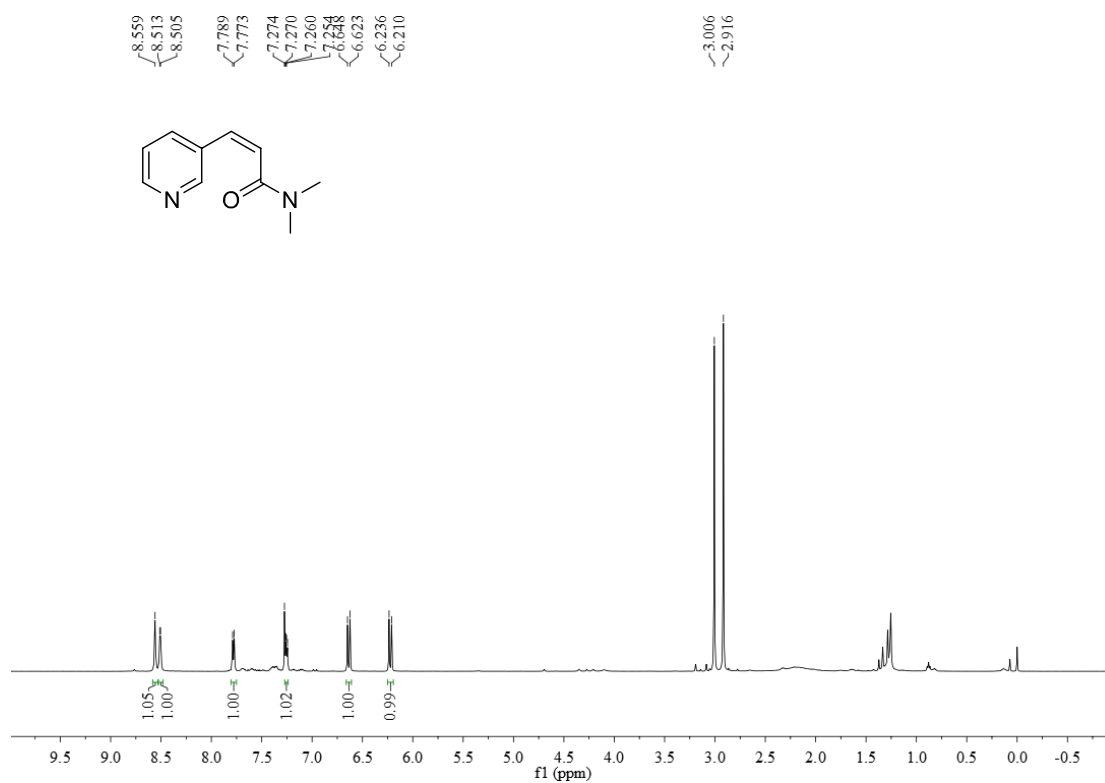

<sup>13</sup>C NMR spectrum (100 MHz, CDCl<sub>3</sub>) of **2o**

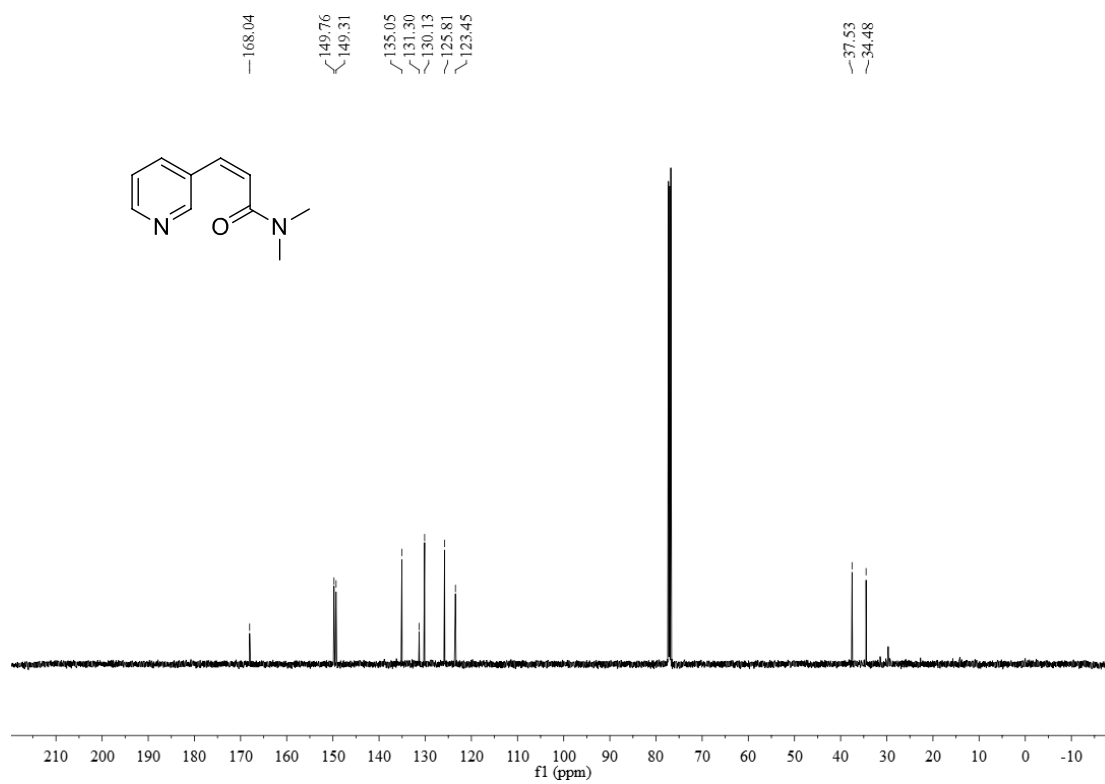

<sup>1</sup>H NMR spectrum (400 MHz, CDCl<sub>3</sub>) of **2p**

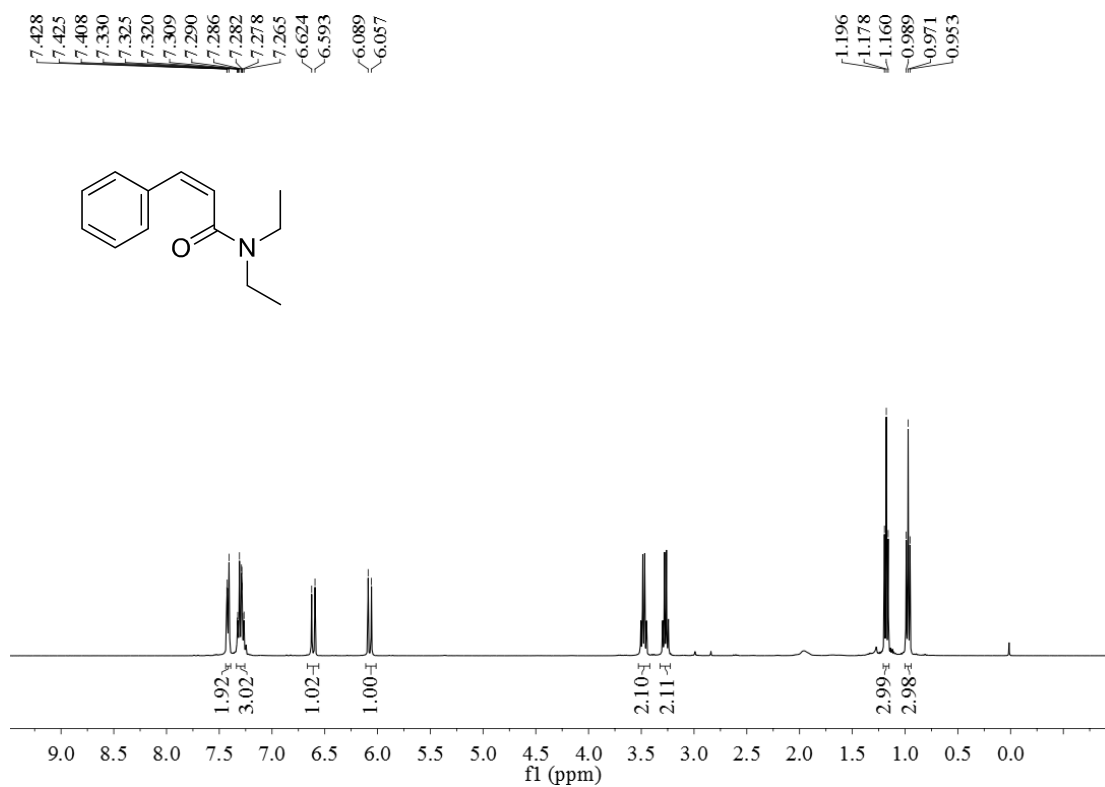

<sup>13</sup>C NMR spectrum (100 MHz, CDCl<sub>3</sub>) of **2p**

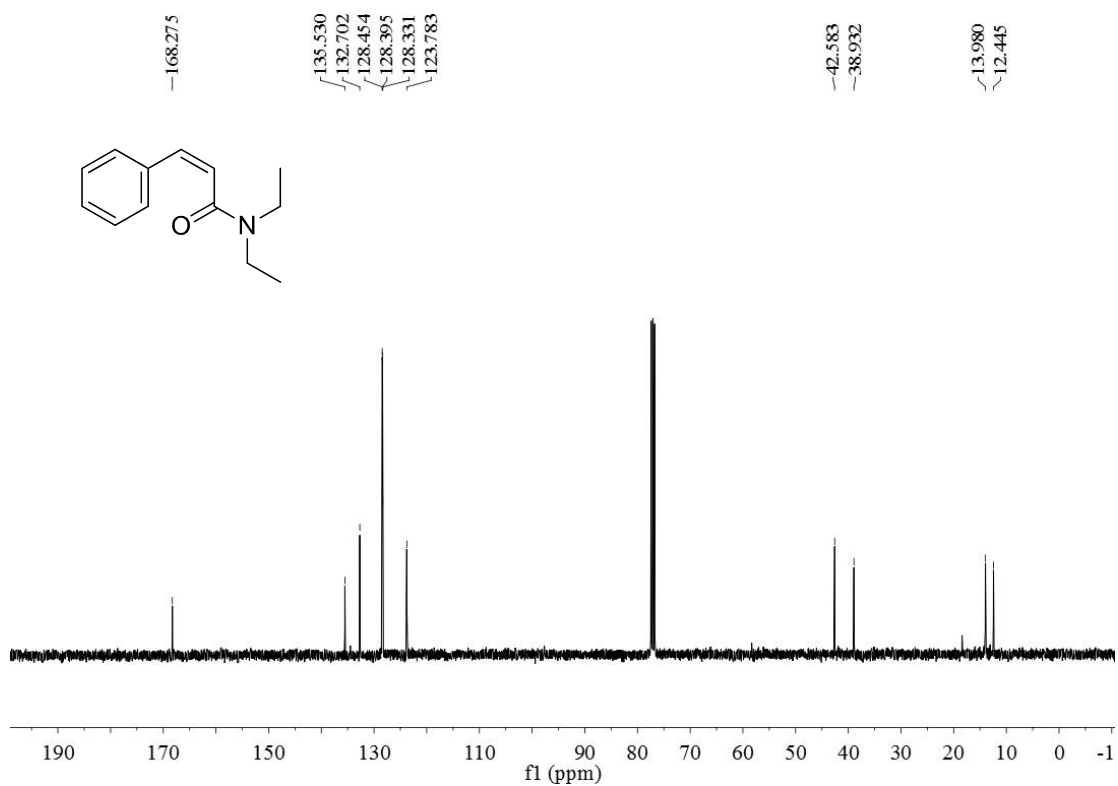

<sup>1</sup>H NMR spectrum (400 MHz, CDCl<sub>3</sub>) of **2q**

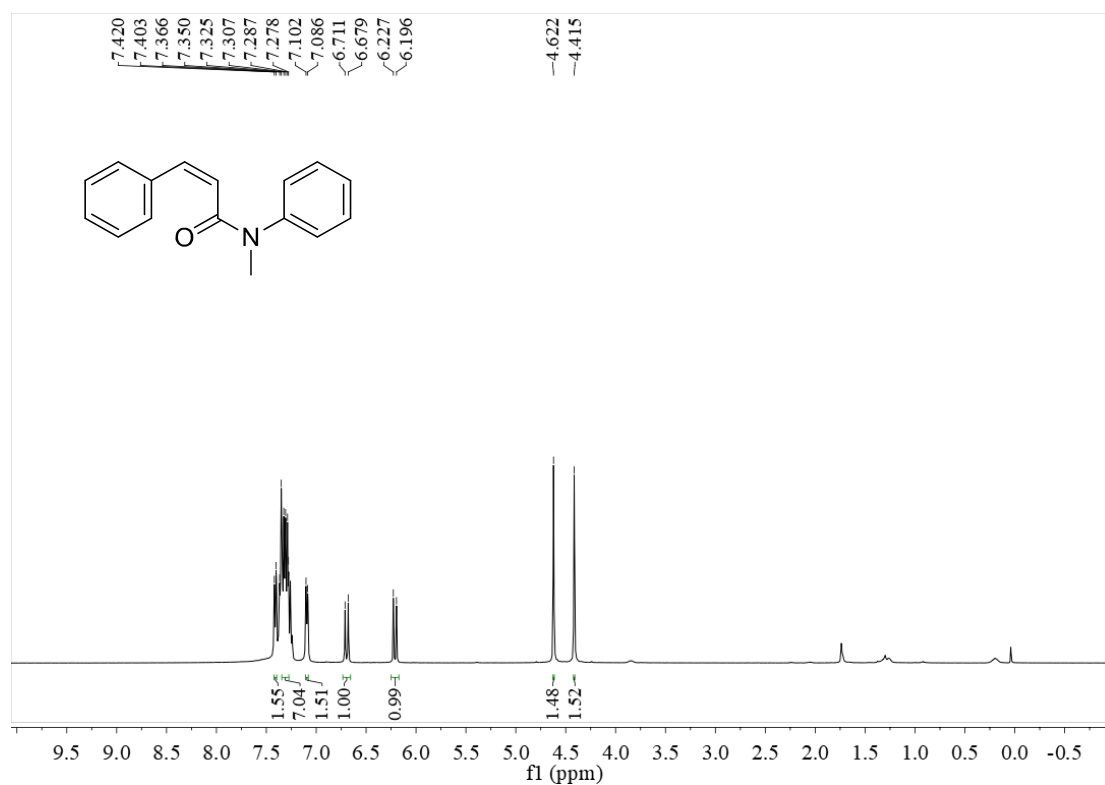

<sup>13</sup>C NMR spectrum (100 MHz, CDCl<sub>3</sub>) of **2q**

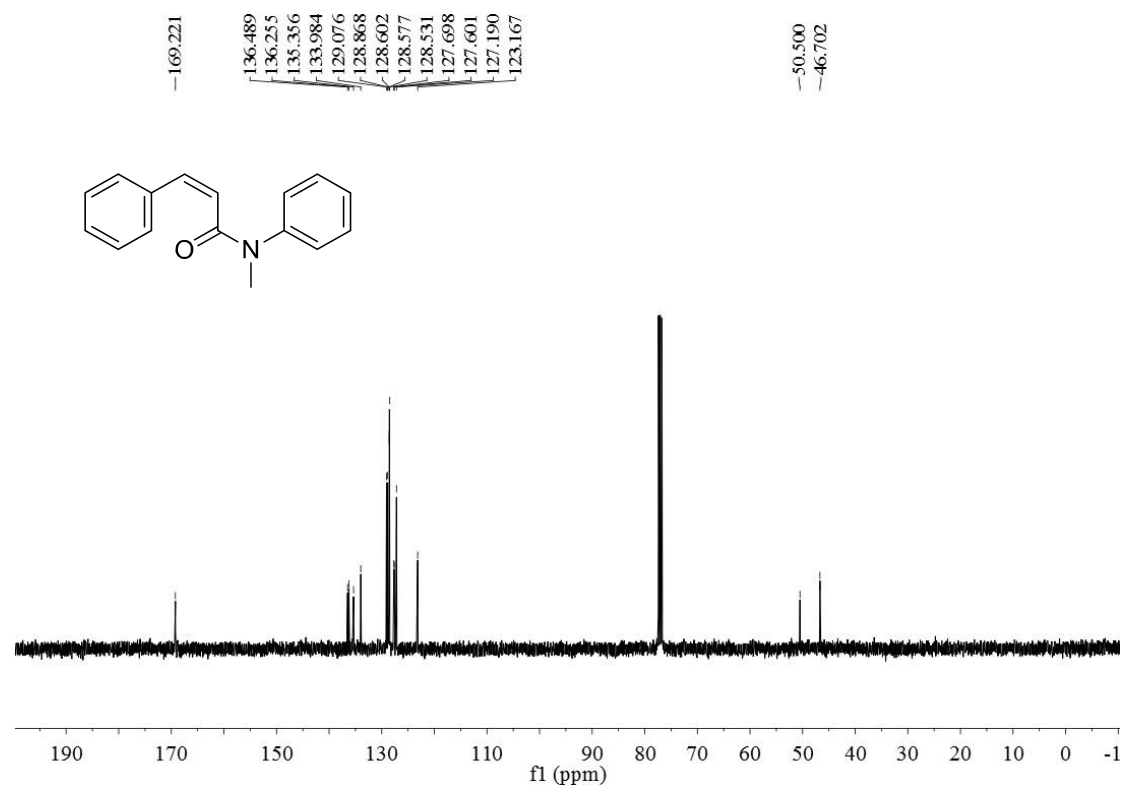

<sup>1</sup>H NMR spectrum (400 MHz, CDCl<sub>3</sub>) of **2r**

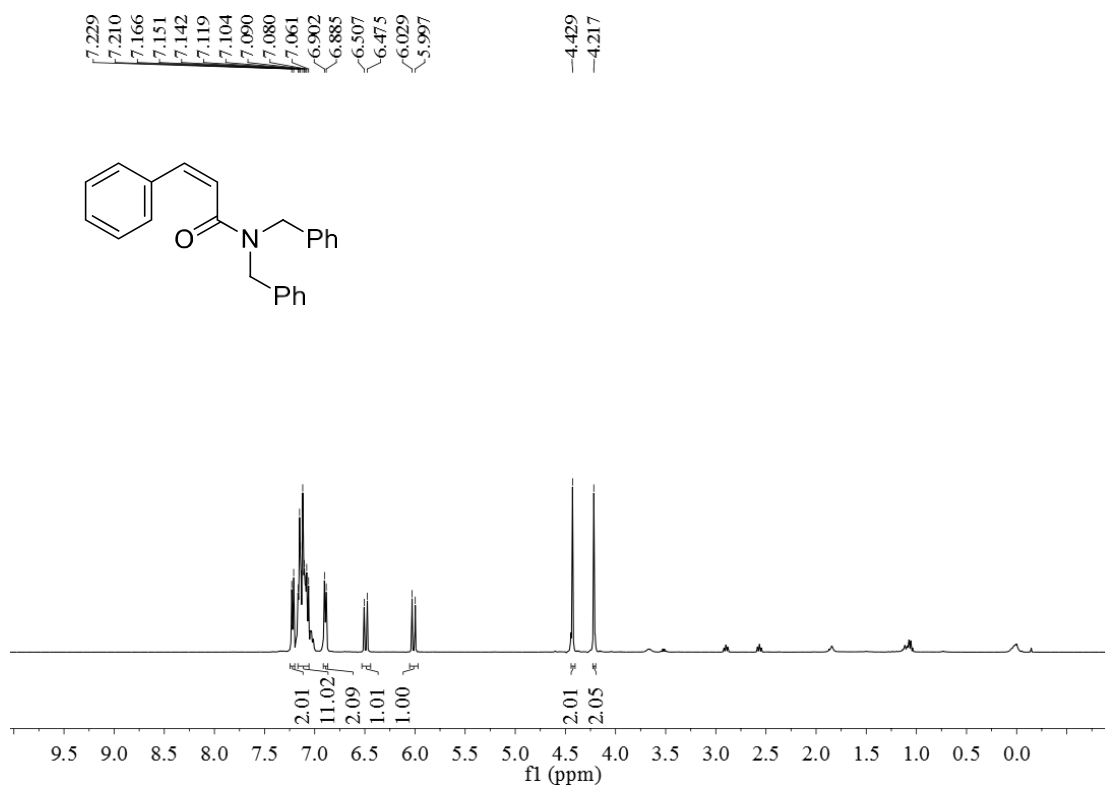

<sup>13</sup>C NMR spectrum (100 MHz, CDCl<sub>3</sub>) of **2r**

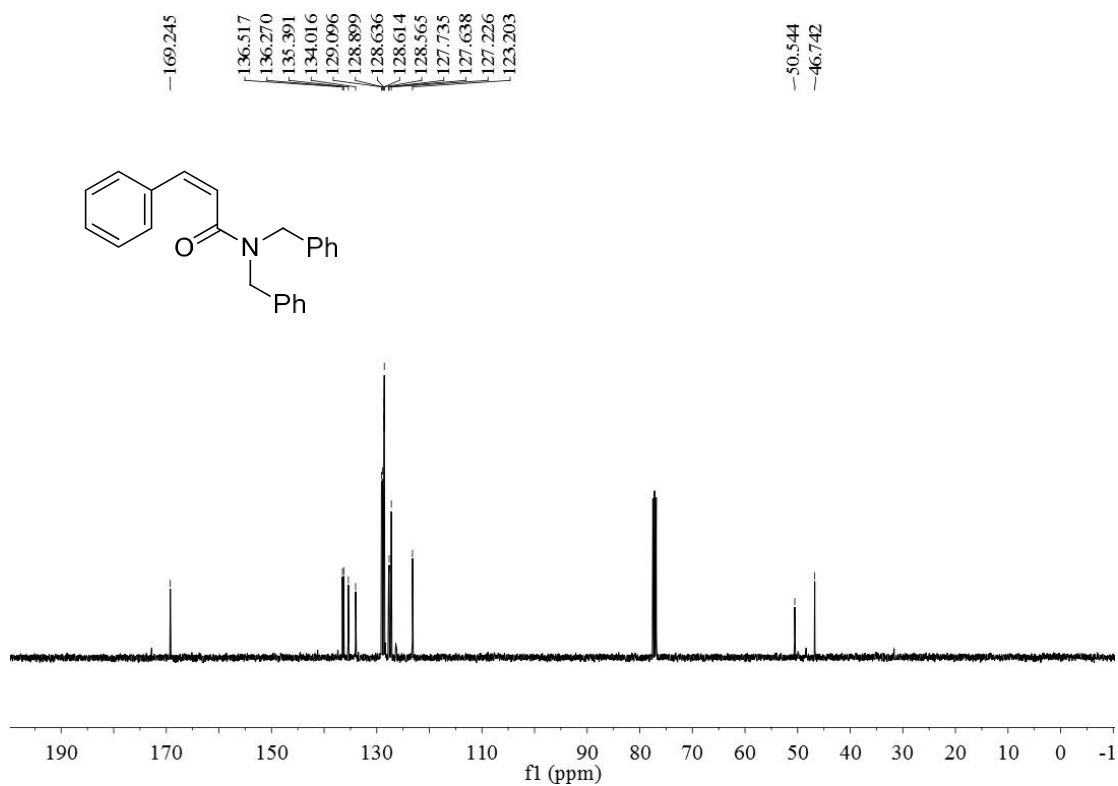

<sup>1</sup>H NMR spectrum (400 MHz, CDCl<sub>3</sub>) of **2s**

7.446  
7.430  
7.352  
7.335  
7.287  
7.265  
7.259  
6.948  
6.428  
6.396  
5.924  
5.861  
5.829  
5.163  
5.140  
5.118  
4.407  
4.392

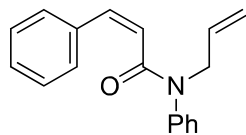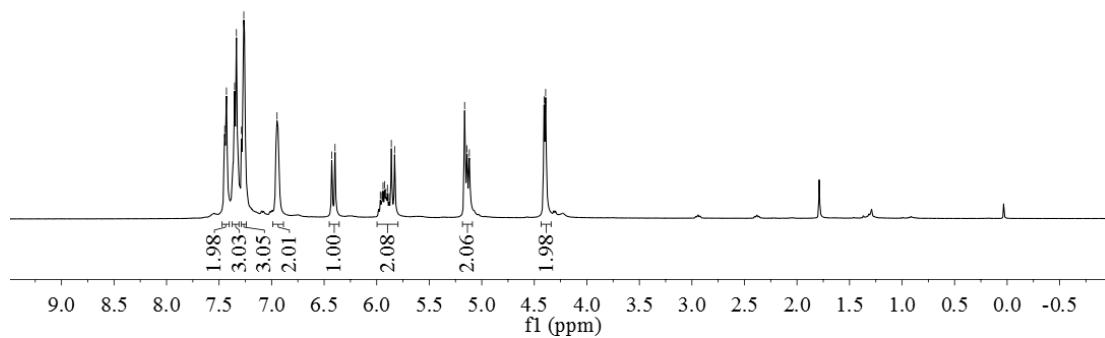

<sup>13</sup>C NMR spectrum (100 MHz, CDCl<sub>3</sub>) of **2s**

167.459  
142.015  
135.591  
135.284  
132.845  
129.037  
128.977  
128.432  
128.216  
127.640  
127.520  
123.896  
118.103  
51.743

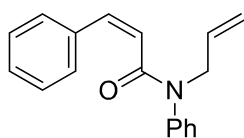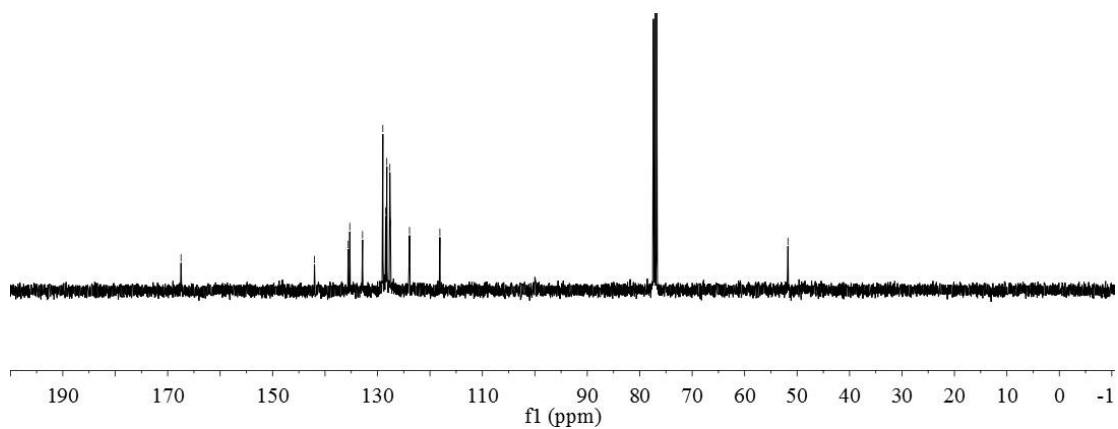

<sup>1</sup>H NMR spectrum (400 MHz, CDCl<sub>3</sub>) of **2t**

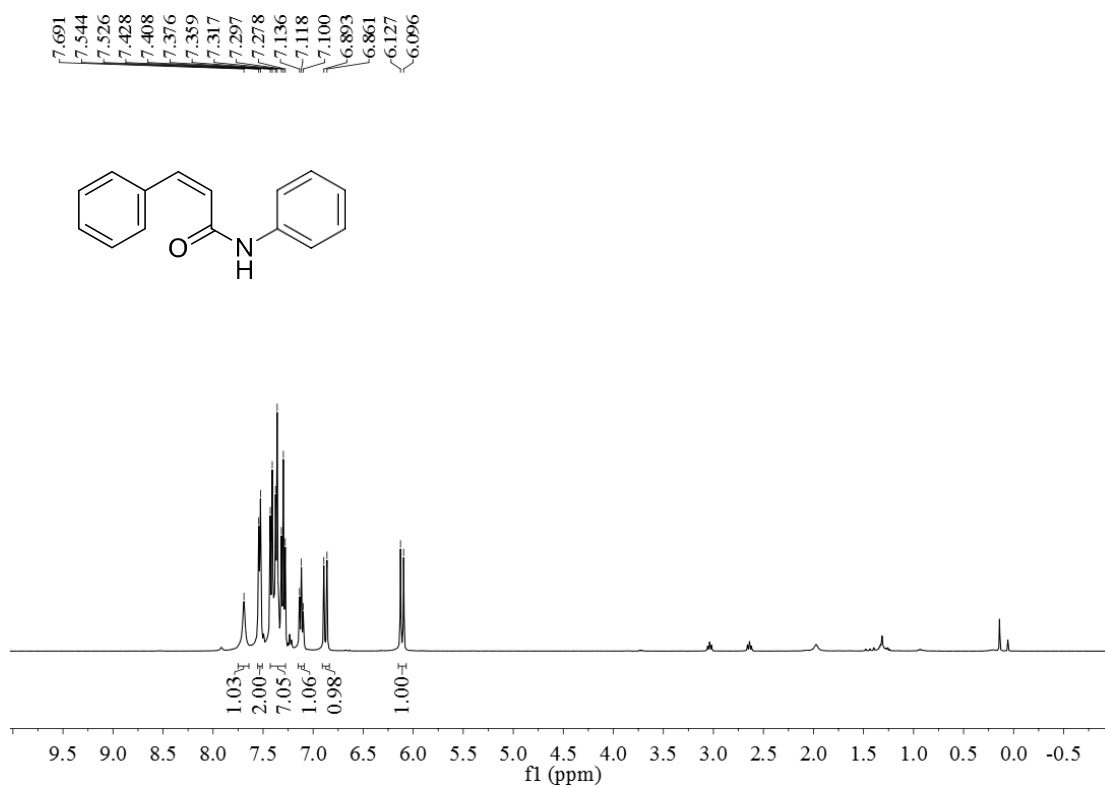

<sup>13</sup>C NMR spectrum (100 MHz, CDCl<sub>3</sub>) of **2t**

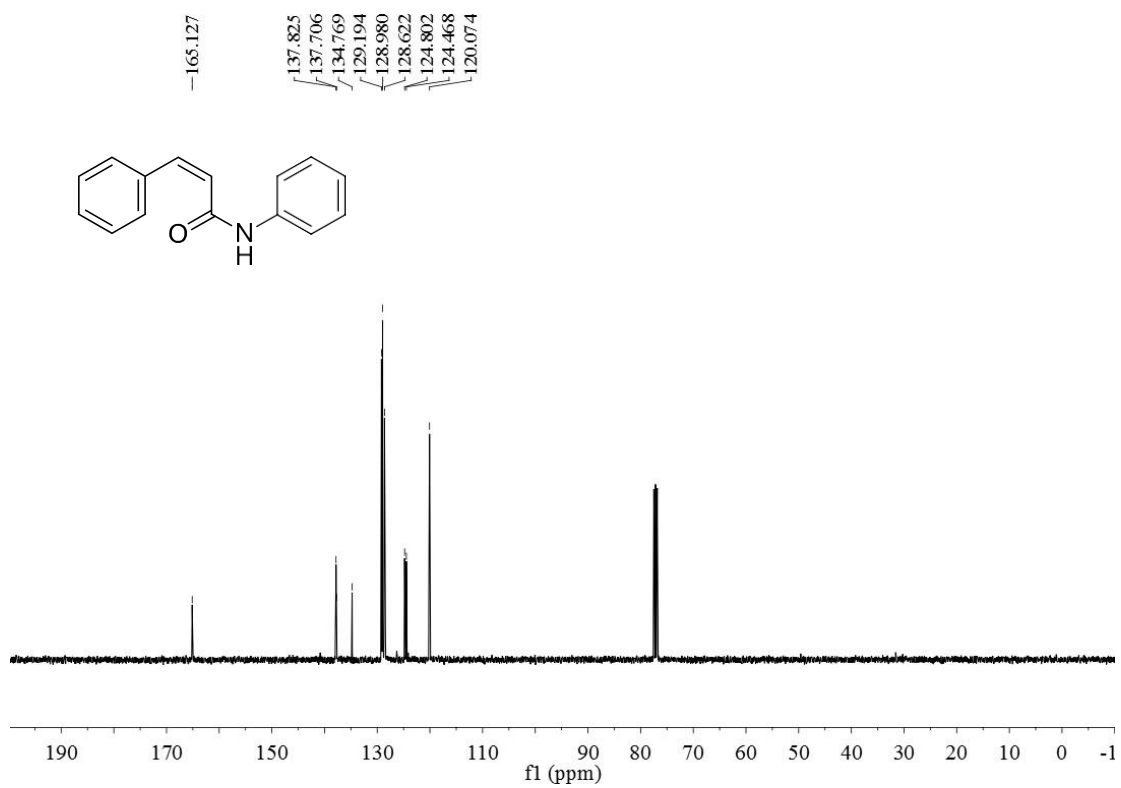

<sup>1</sup>H NMR spectrum (400 MHz, CDCl<sub>3</sub>) of **2u**

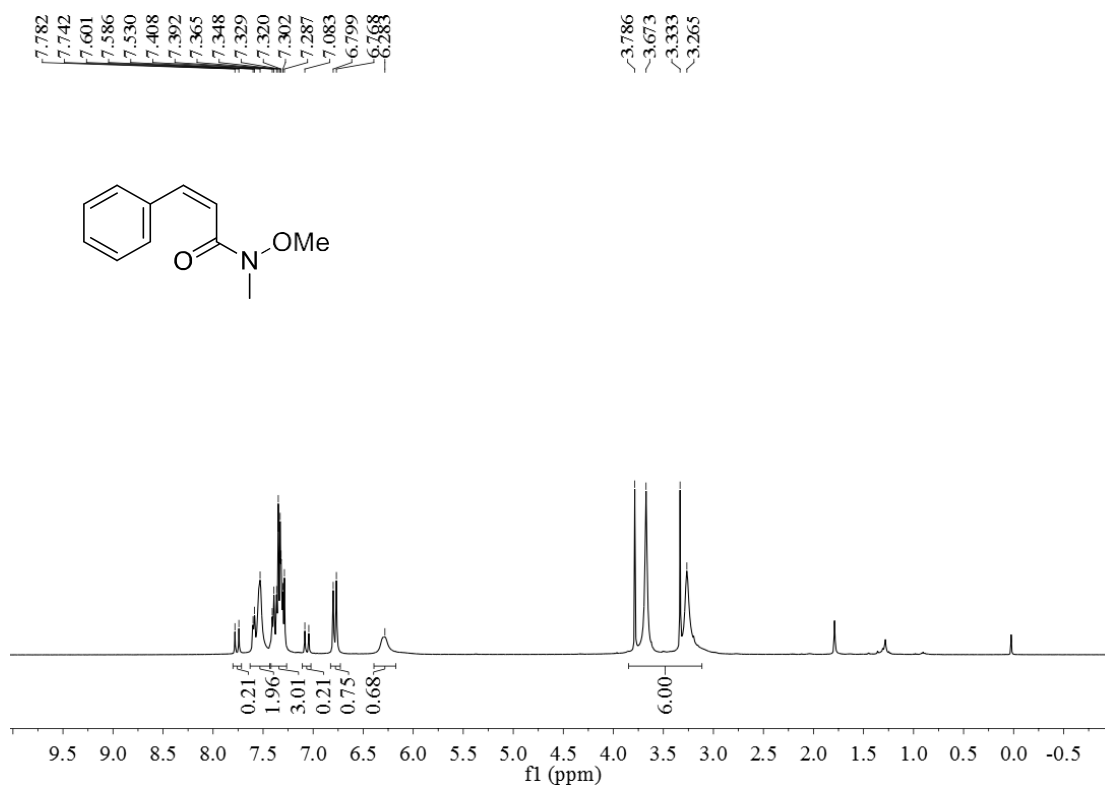

<sup>13</sup>C NMR spectrum (100 MHz, CDCl<sub>3</sub>) of **2u**

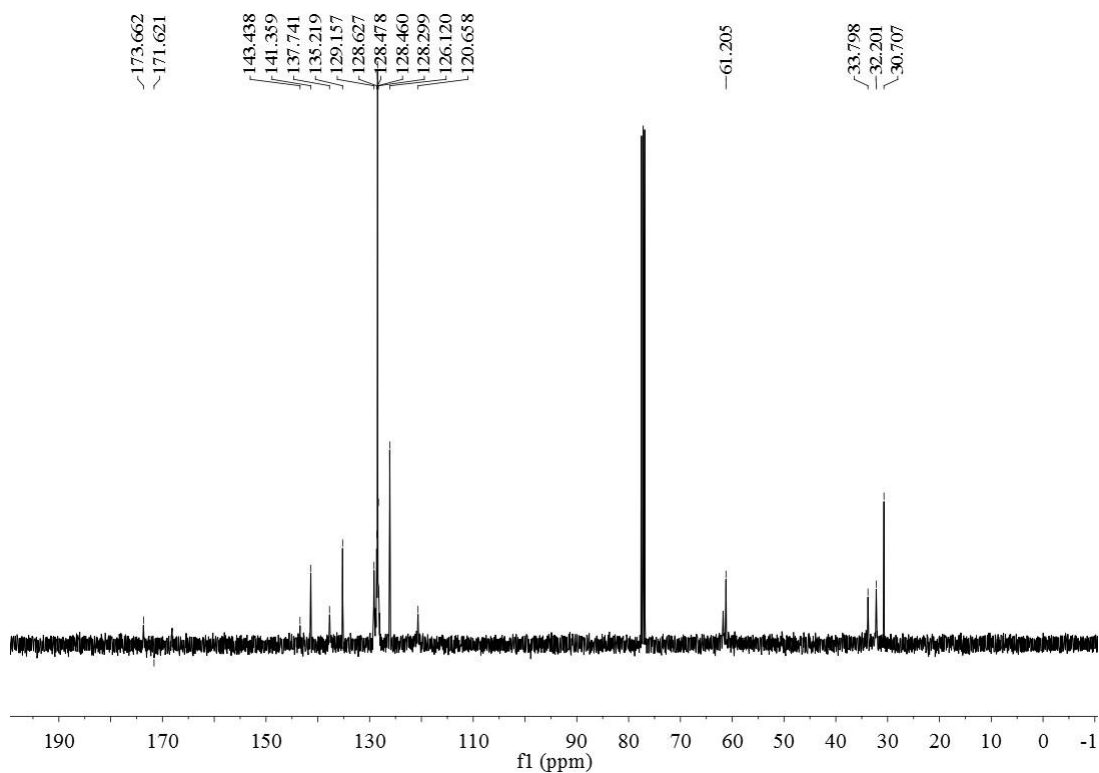

<sup>1</sup>H NMR spectrum (400 MHz, CDCl<sub>3</sub>) of **2v**

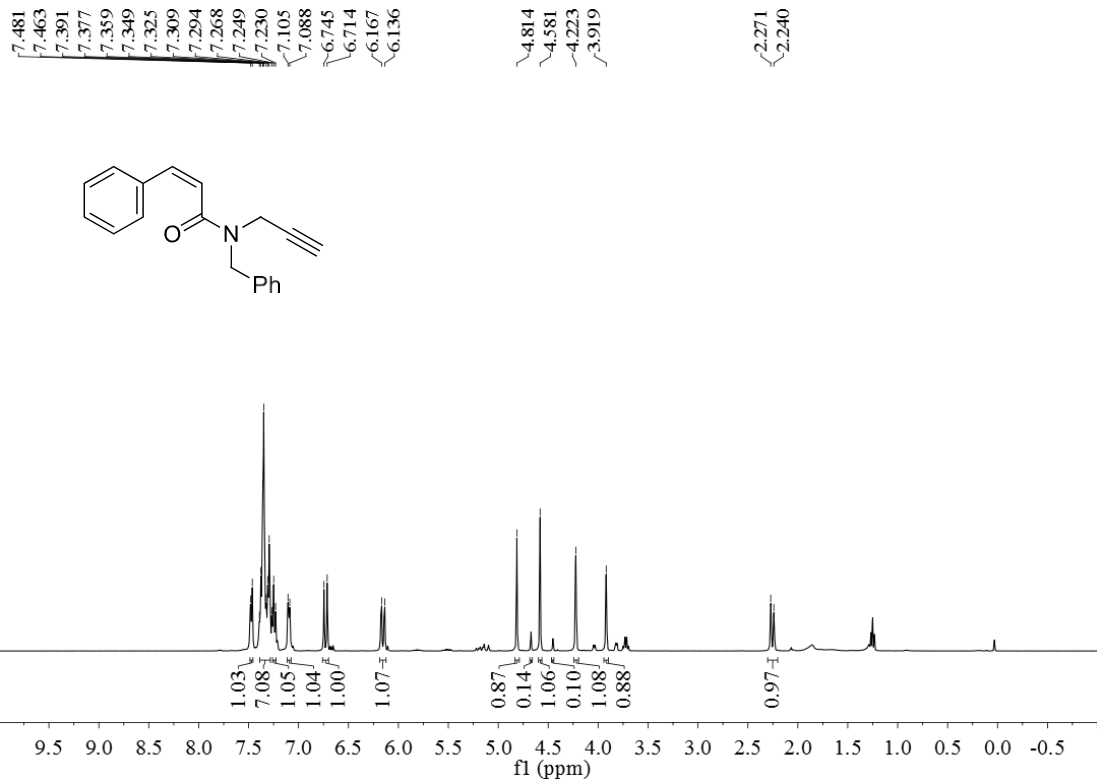

<sup>13</sup>C NMR spectrum (100 MHz, CDCl<sub>3</sub>) of **2v**

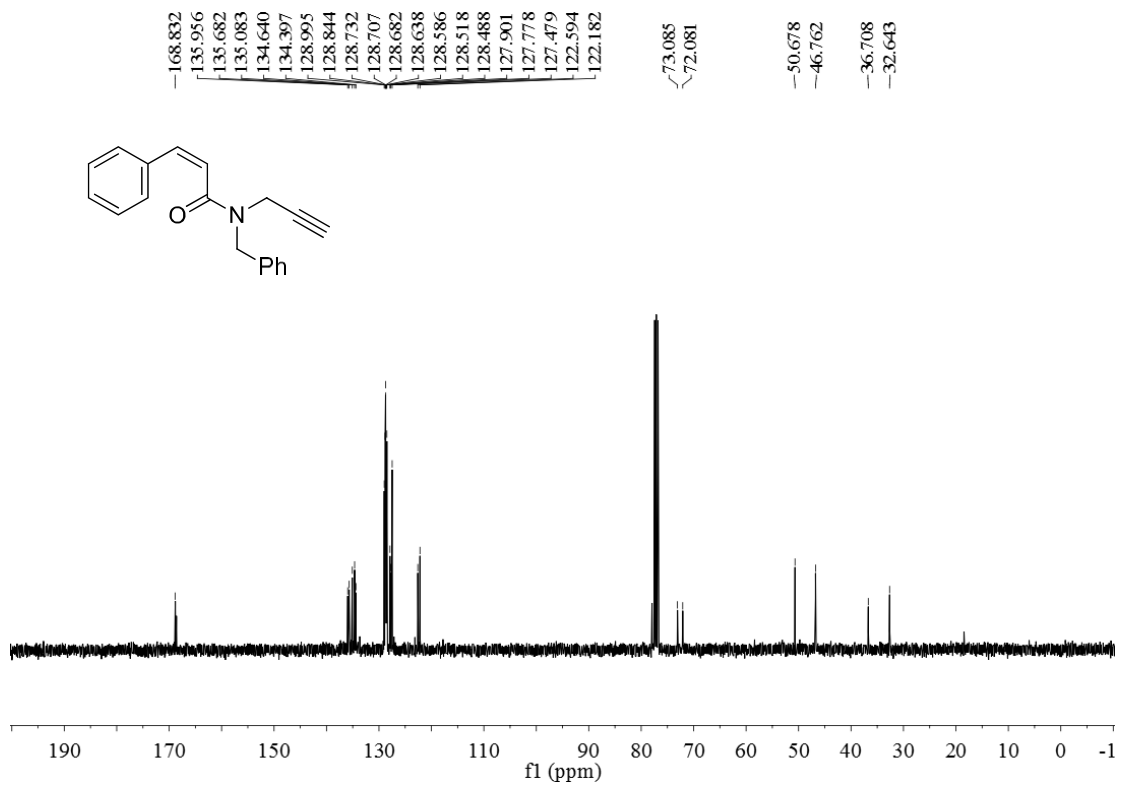



<sup>1</sup>H NMR spectrum (400 MHz, CDCl<sub>3</sub>) of **2w**

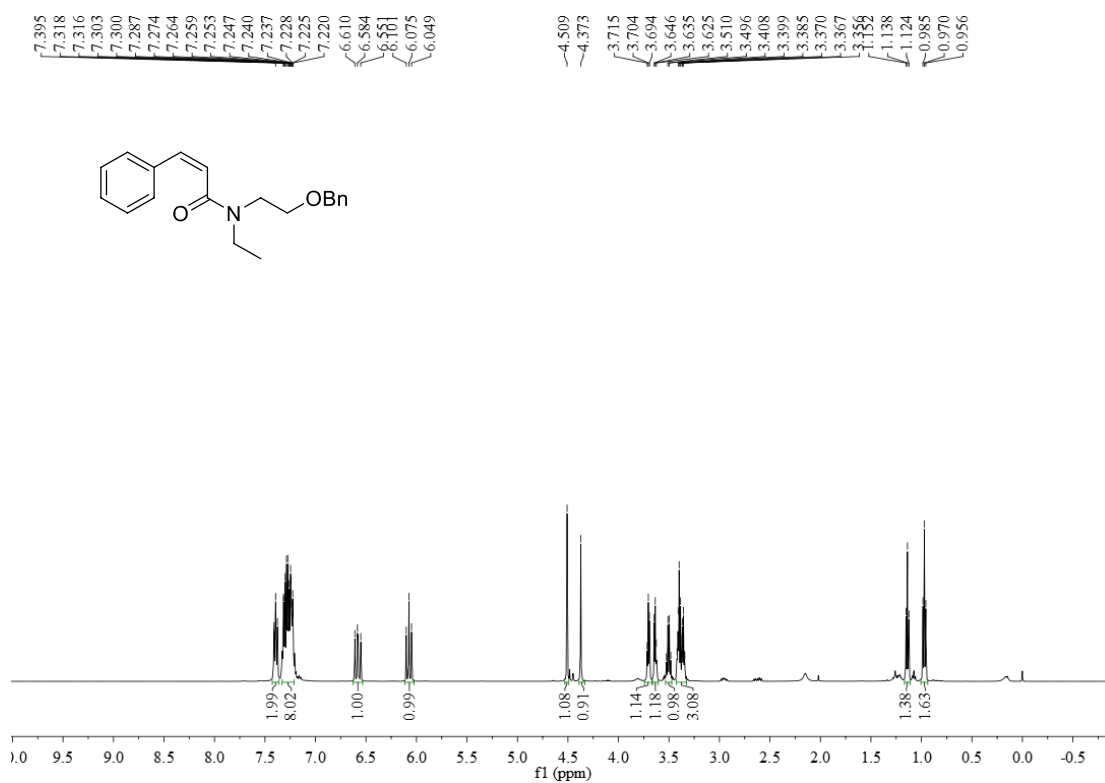

<sup>13</sup>C NMR spectrum (100 MHz, CDCl<sub>3</sub>) of **2w**

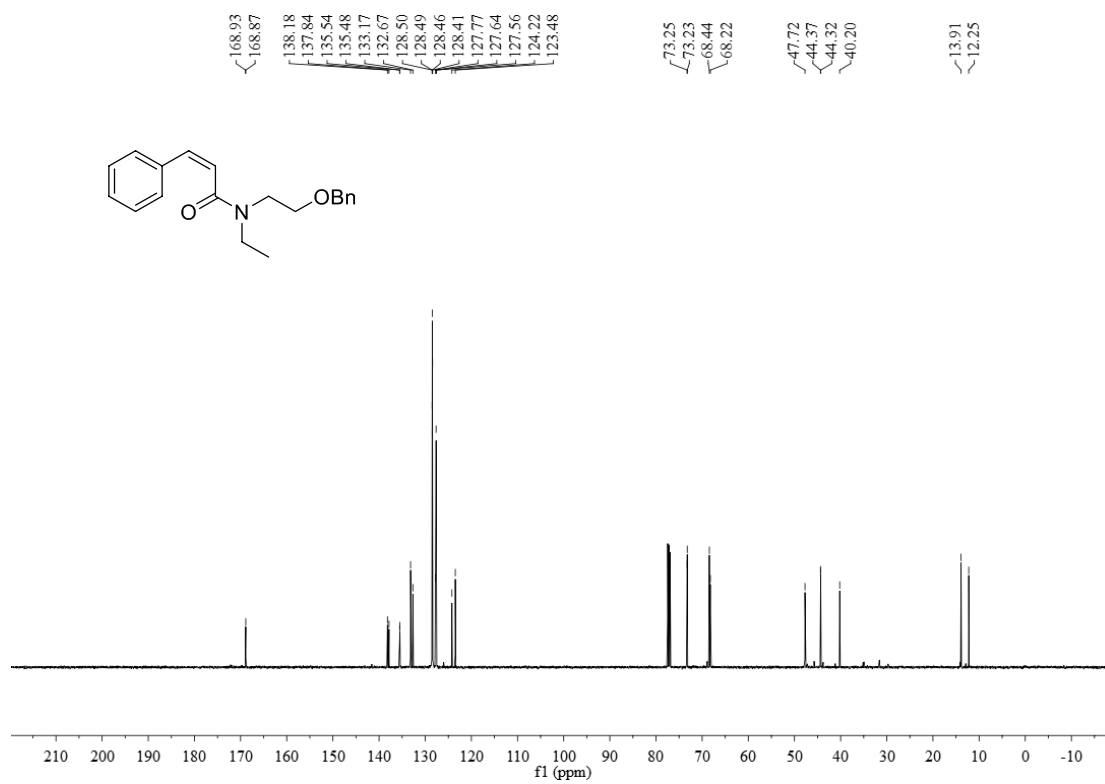

Supplement: d0ob02037k1.pdf [file d0ob02037k1.pdf]
